# Supplementary material for: Three competitive transition states in the benzoin condensation compared to the clear rate-determining step in the Cannizzaro reaction
Source: Royal Society of Chemistry journal article supplement (doi:10.1039/b817849f), 2009-01-01
Supplement: b817849f.pdf [file b817849f.pdf]

## Supplementary Information

### Three Competitive Transition States in the Benzoin Condensation Compared to the Clear Rate-determining Step in the Cannizzaro Reaction

Shinichi Yamabe\* and Shoko Yamazaki

*Department of Chemistry, Nara University of Education, Takabatake-cho, Nara 630-8528,*

*Japan*

*yamabes@nara-edu.ac.jp*

- Scheme S1.** An alternative route to afford the benzoin product. Page S2
- Figure S1.** Geometries of the reactant-like complex (precursor) and Ints (intermediates) in Fig. 1. Page S3-4
- Figure S2** Geometries of the reactant-like complex (precursor) and Int1(B)-Int6(B), TS1(B), TS2(B), TS5(B), TS6(B) and product(B). Page S5-9
- Figure S3.** Geometries of extended models, precursor, TS3'(B), TS4'(B) and TS7'(B) (with large activation energies) in the benzoin condensation of (benzaldehyde)<sub>2</sub> + CN<sup>-</sup> + (H<sub>2</sub>O)<sub>8+6</sub>. Page S10-11
- Figure S4.** Geometries of the species shown in Scheme S1. Page S12-13
- Figure S5.** A hydride-shift TS in the benzoin-condensation reacting system, **8** + **1** + (H<sub>2</sub>O)<sub>8</sub>. Page S14
- Figure S6.** Geometries of the species shown in Scheme 7. Pages S15
- Figure S7.** Geometries of expanded models, precursor and TS2'(C) in the Cannizzaro reaction. Pages S16
- Cartesian coordinates of the optimized TS geometries of Figs. 1, 3, 4 and 5 and Figure S2. Pages S17-24

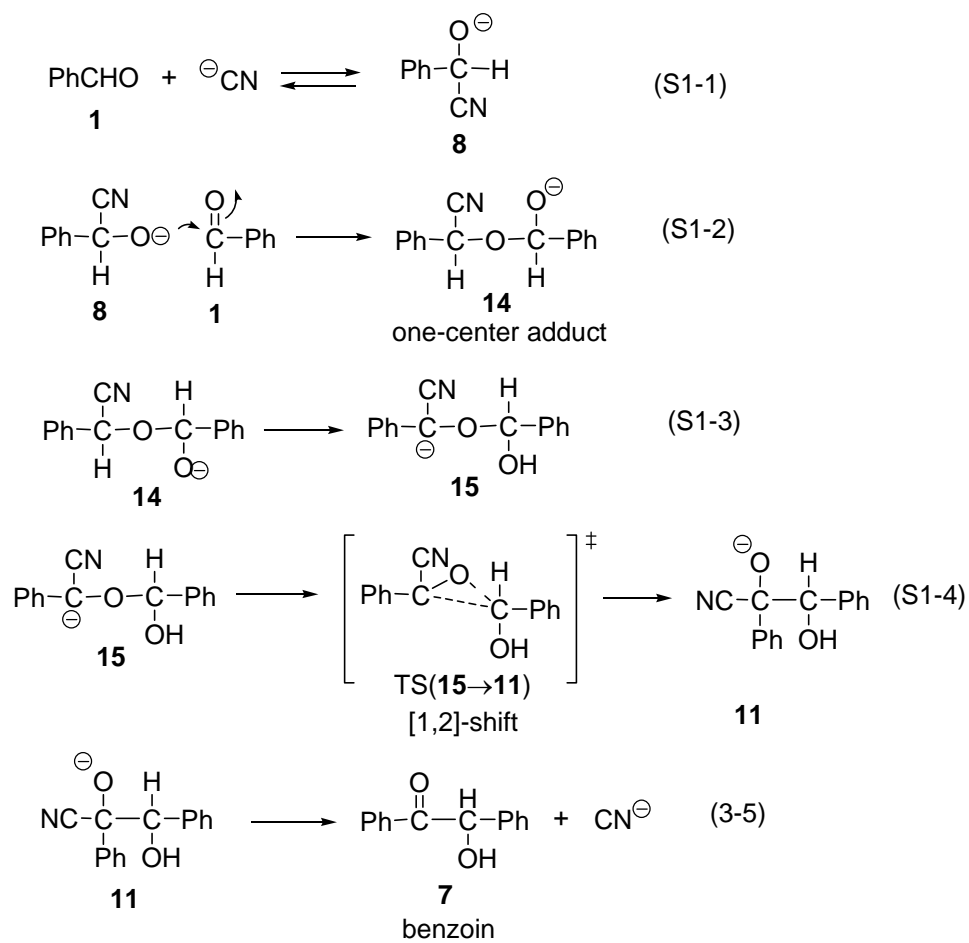

**Scheme S1.** An alternative route to afford the benzoin product.

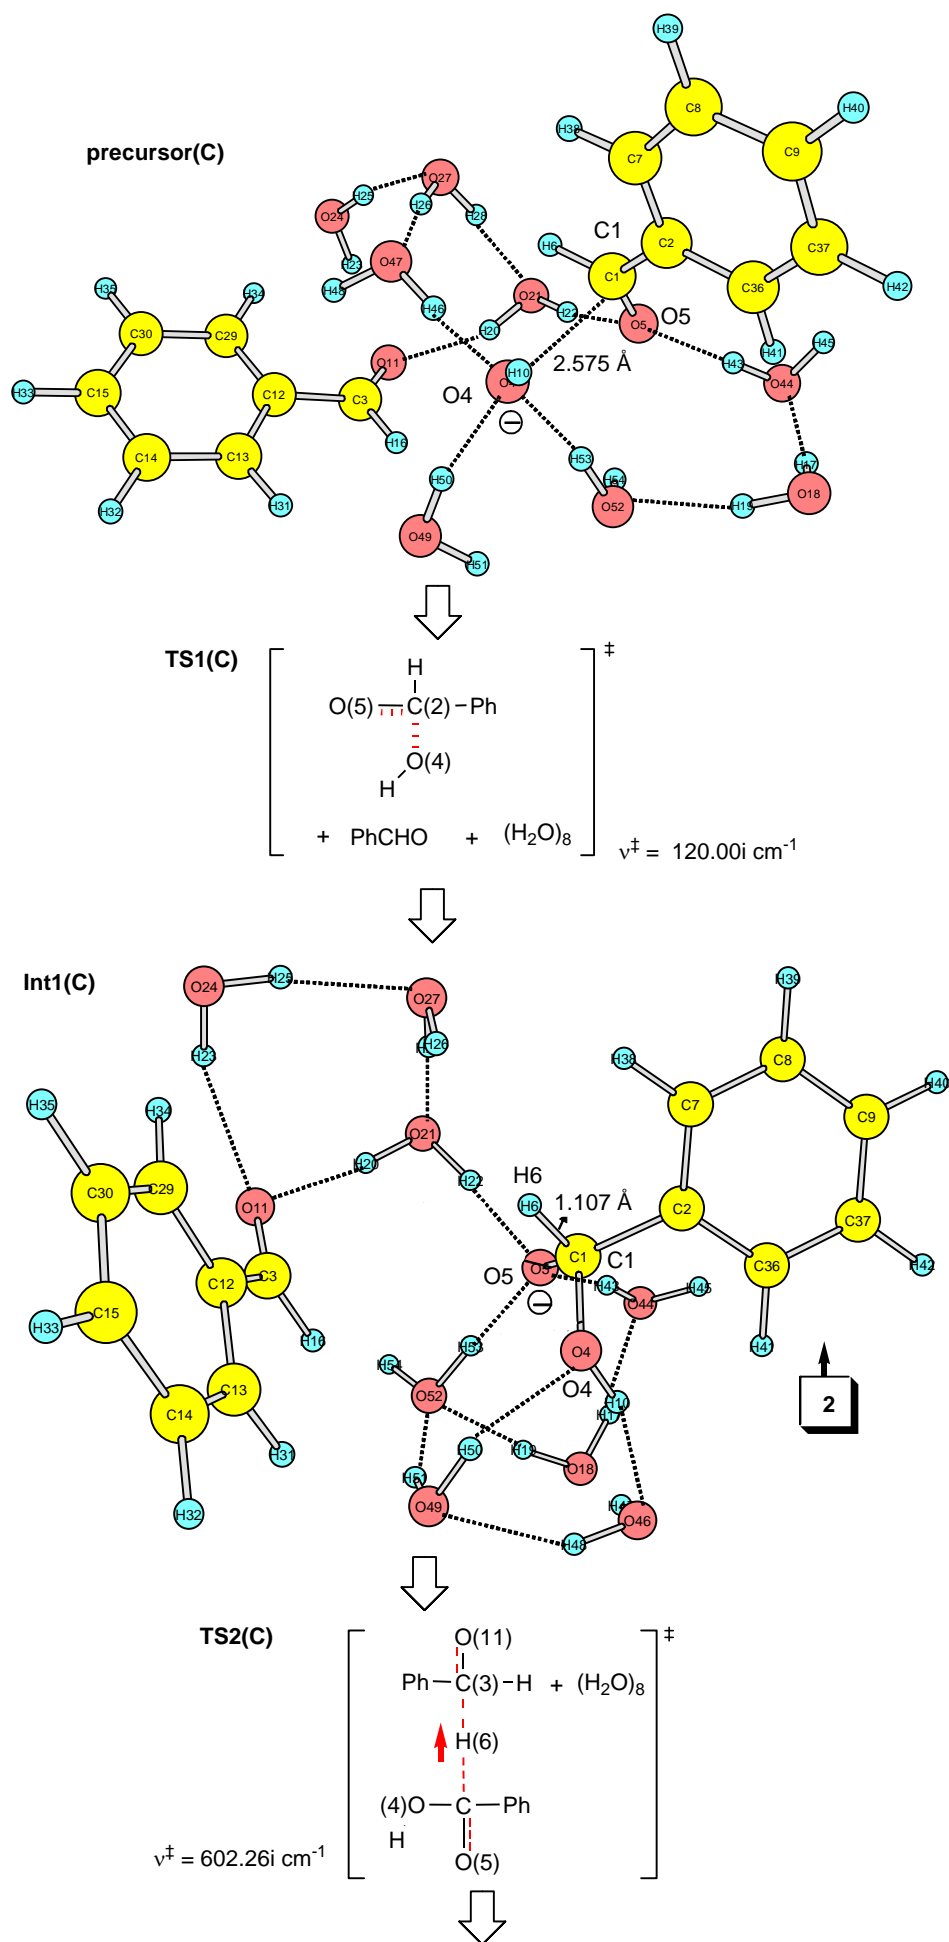

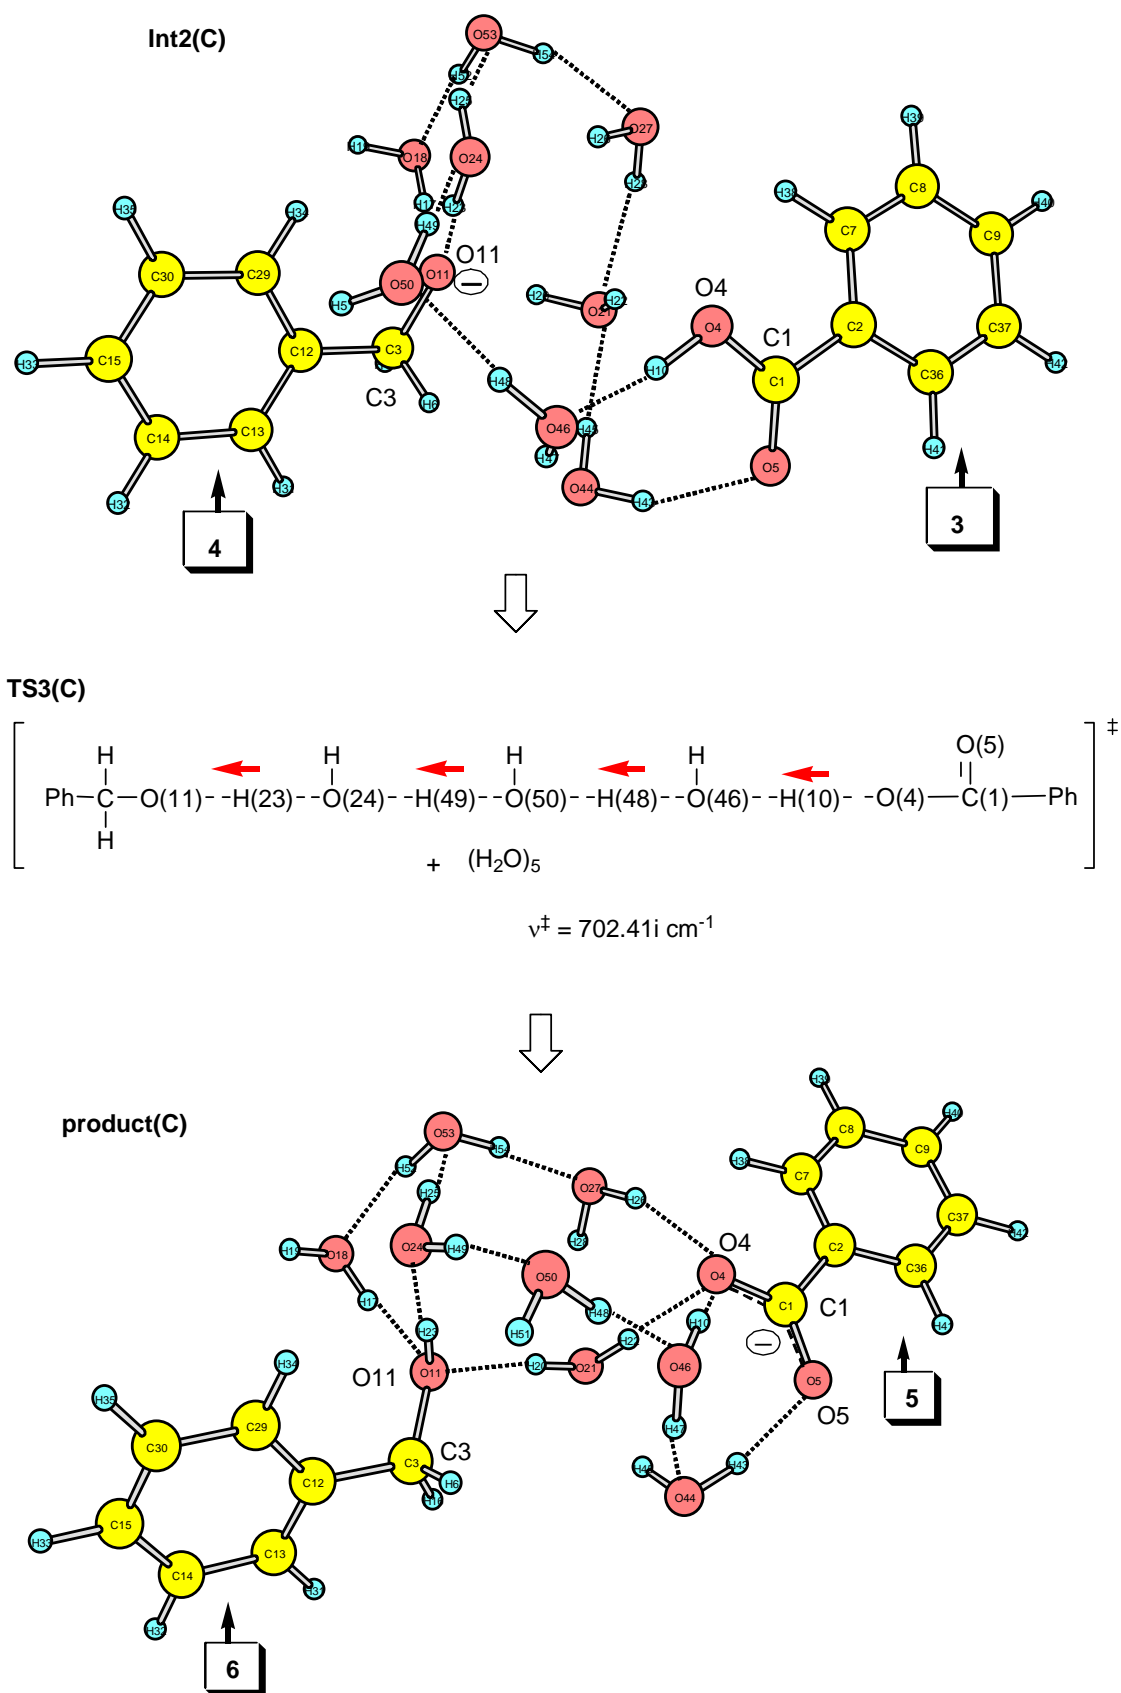

**Figure S1.** Geometries of the reactant-like complex (precursor) and Ints (intermediates) in Fig.

1.

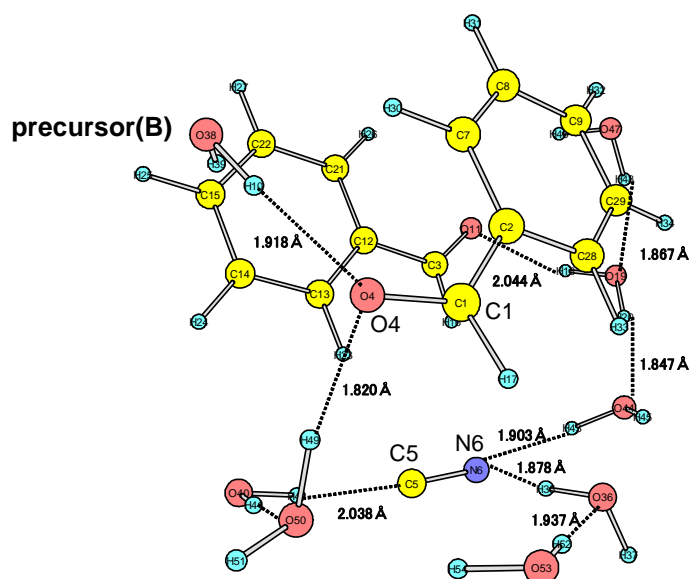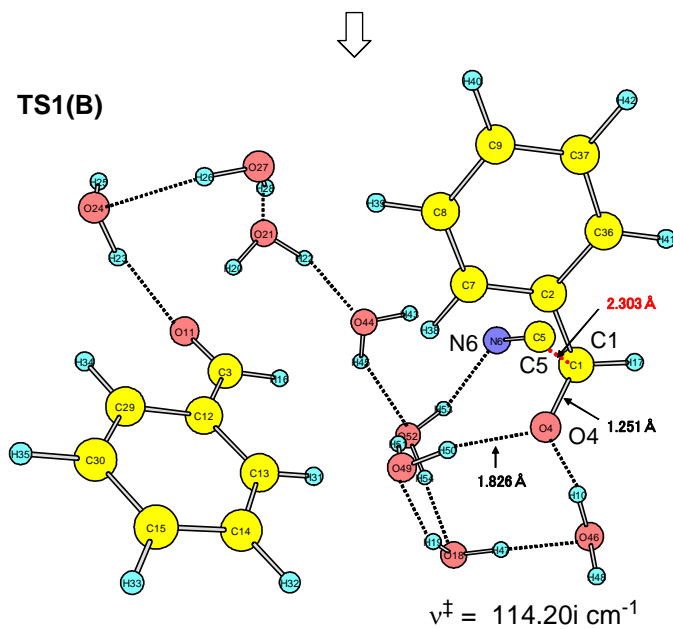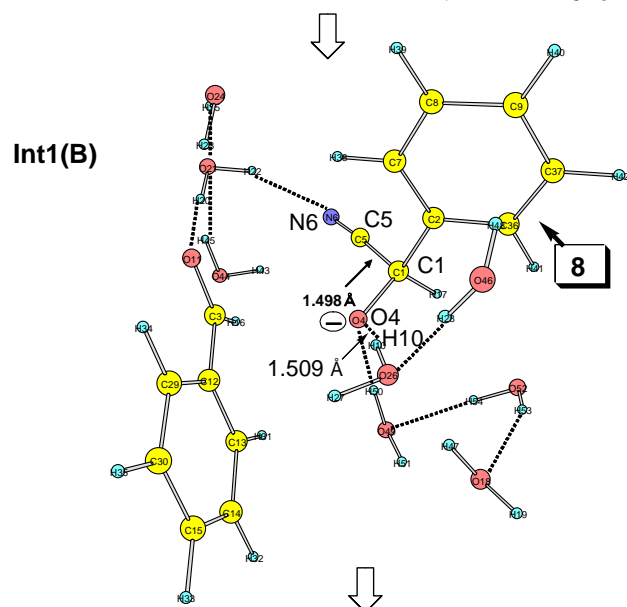

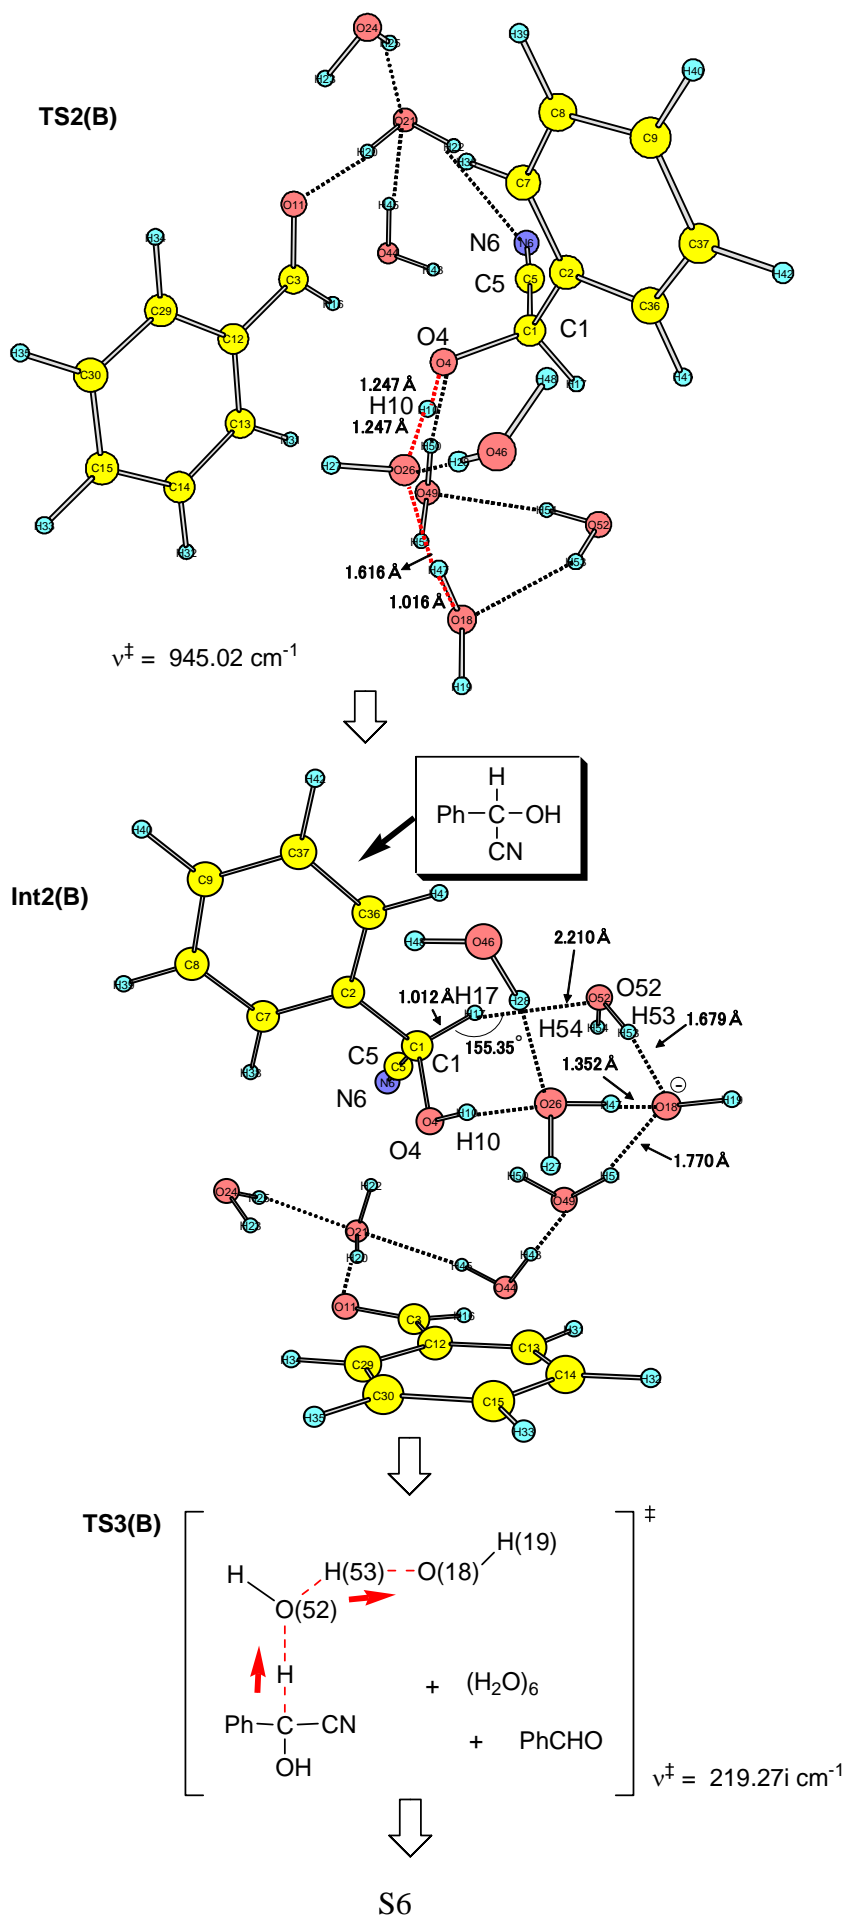

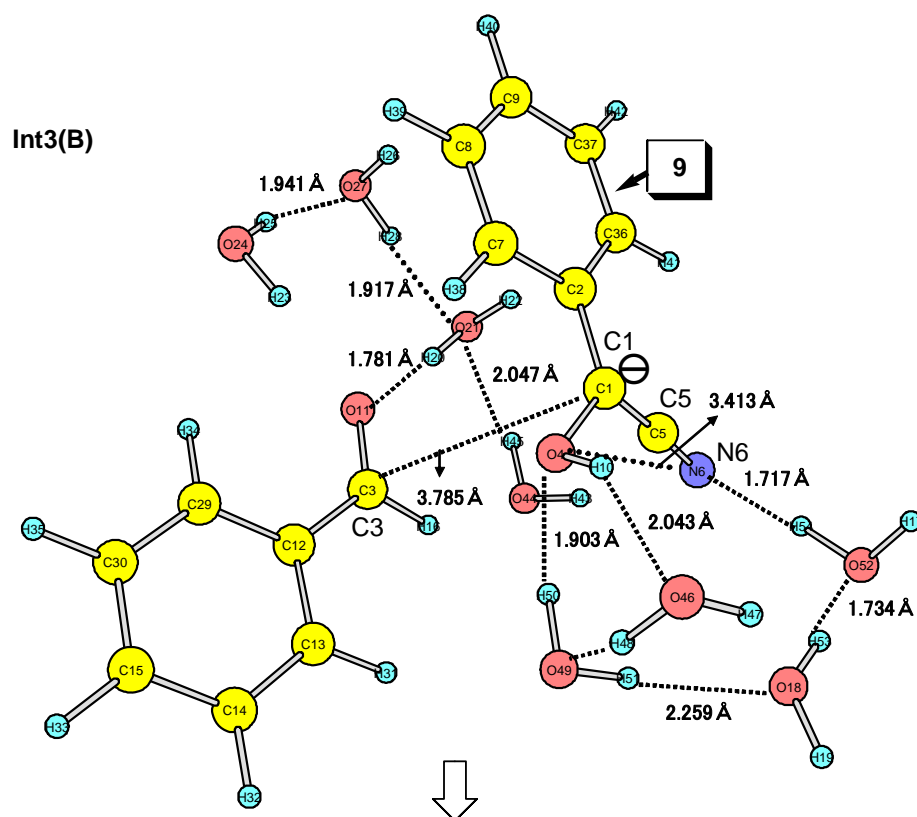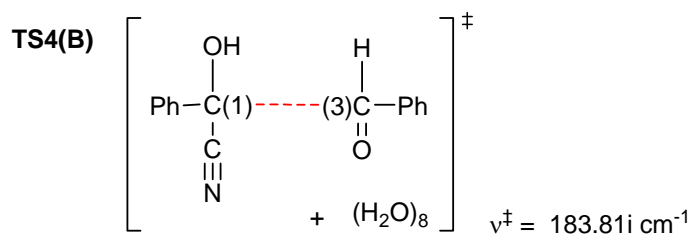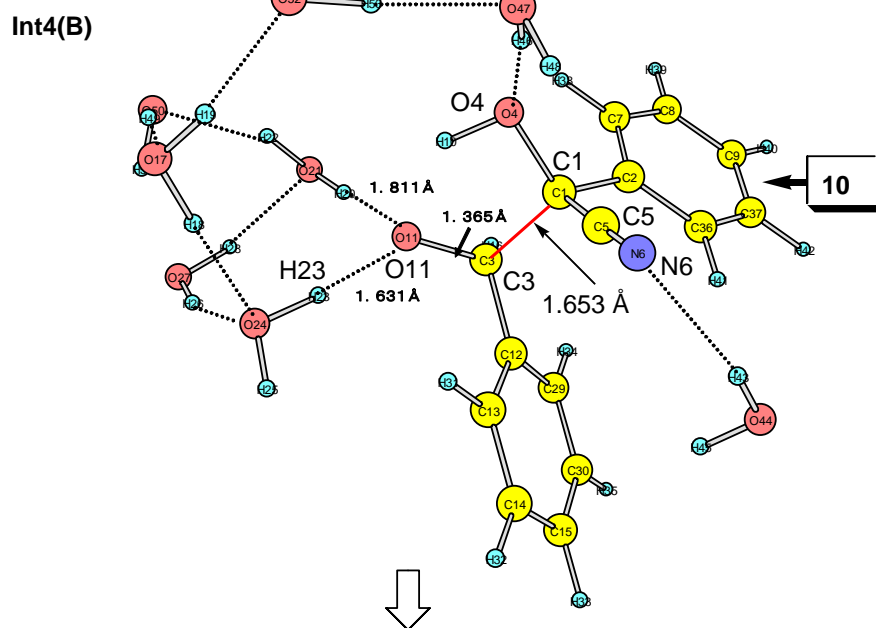

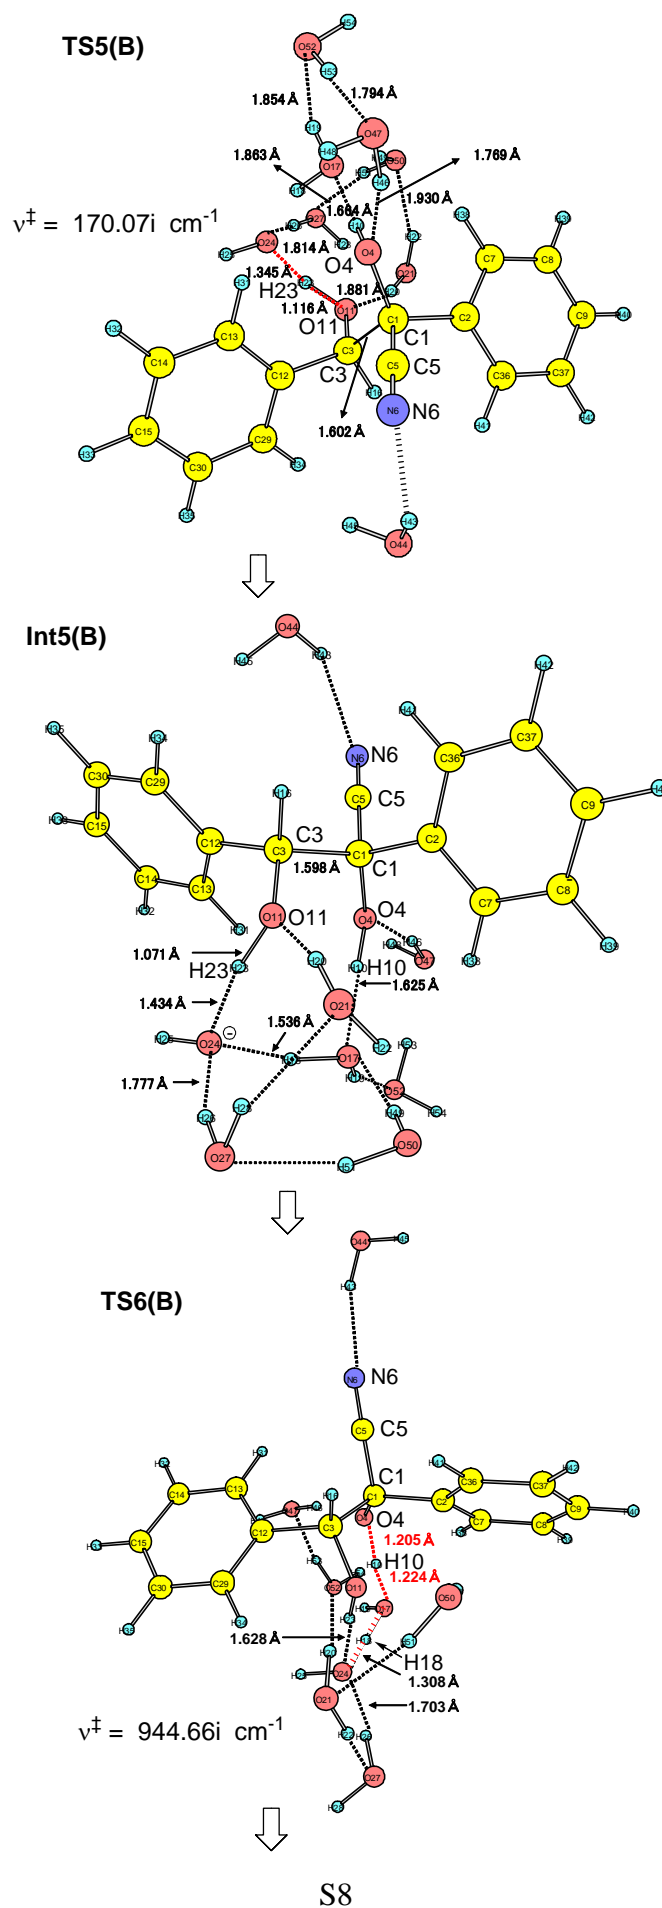



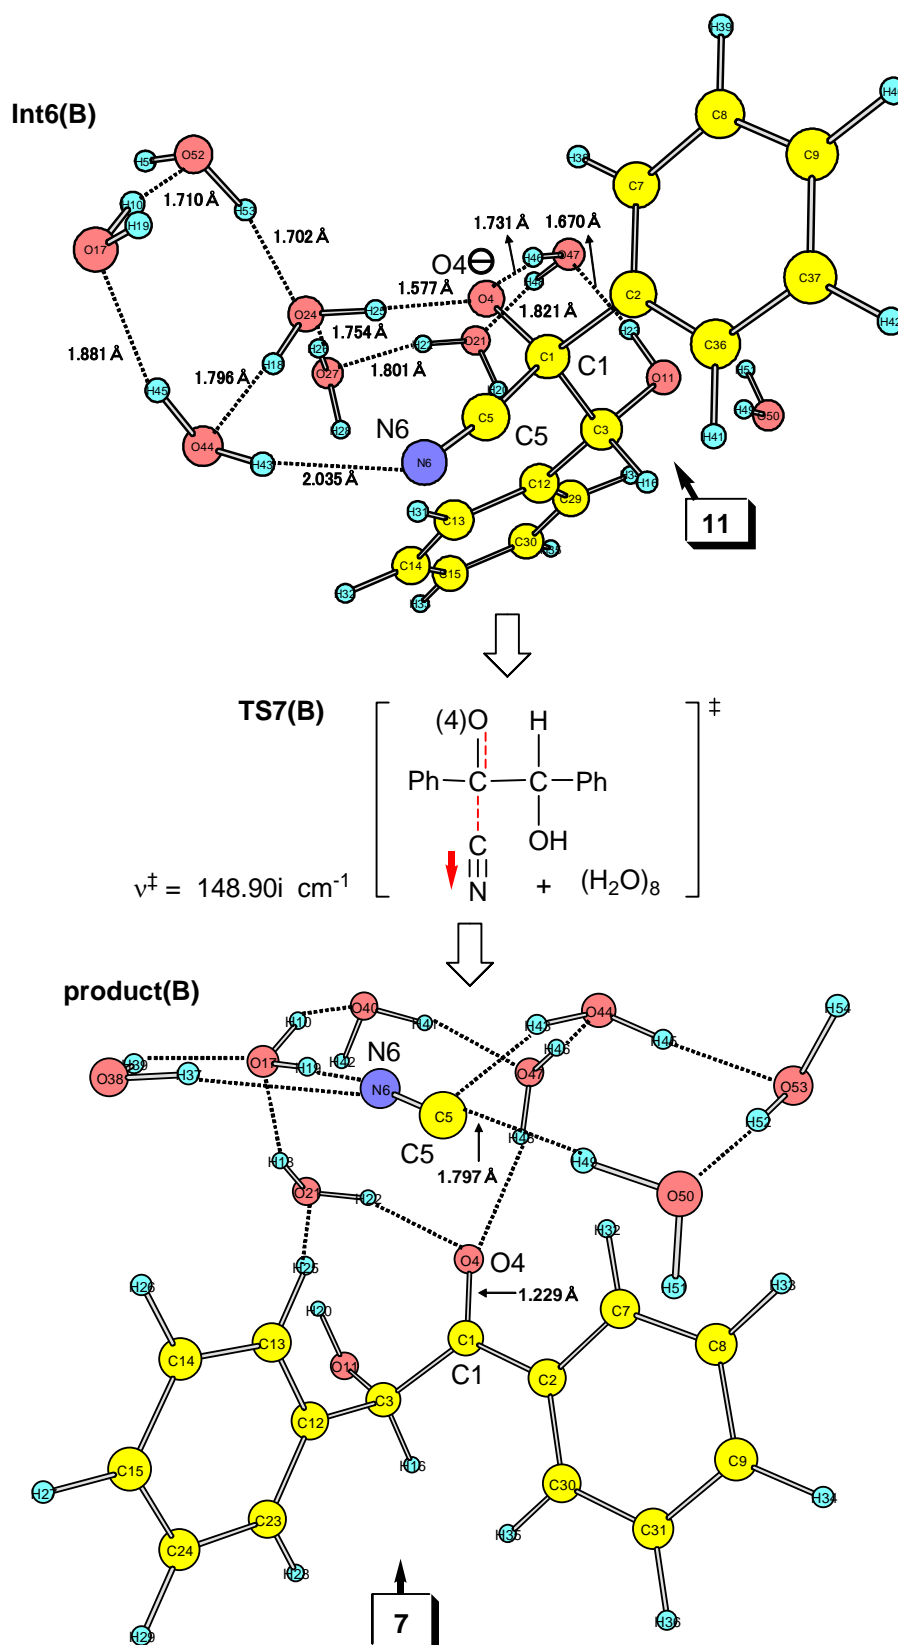

**Figure S2** Geometries of the reactant-like complex (precursor) and Int1(B)-Int6(B), TS1(B), TS2(B), TS5(B), TS6(B) and product(B).

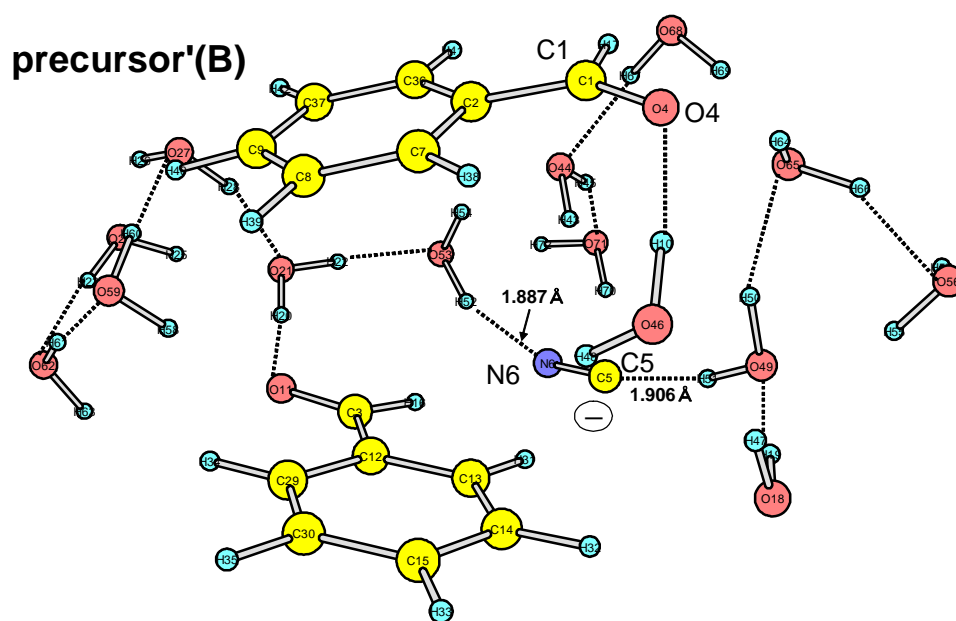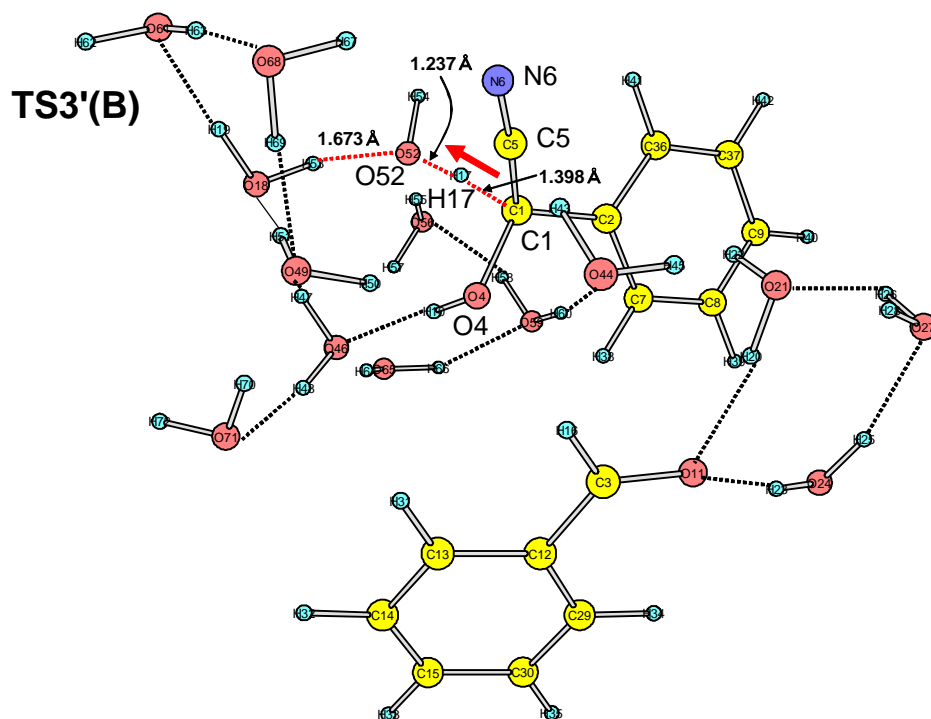

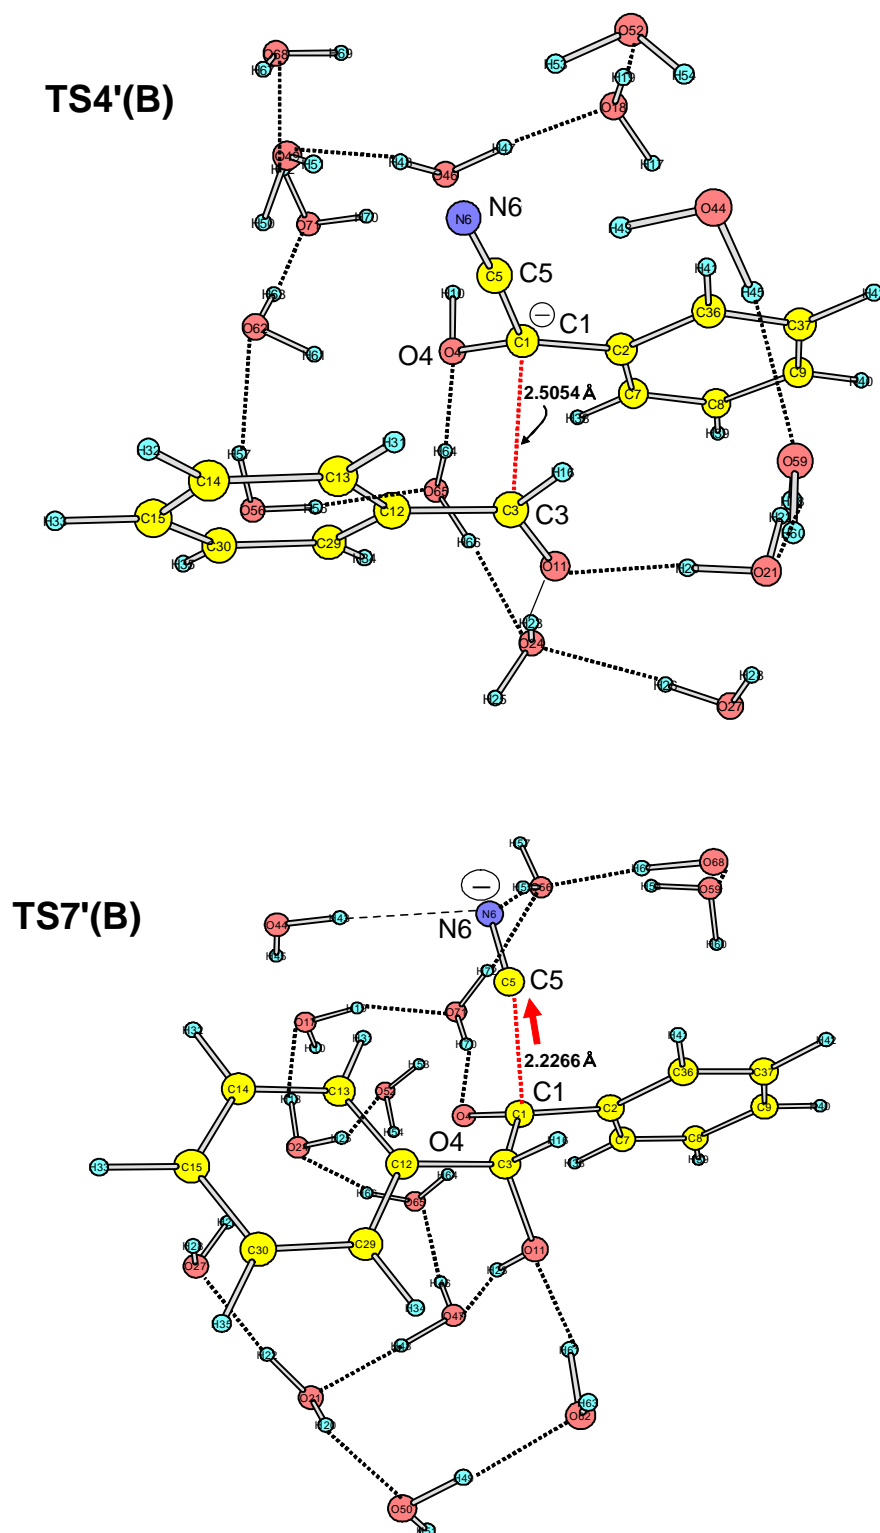

**Figure S3.** Geometries of extended models, precursor, TS3'(B), TS4'(B) and TS7'(B) (with large activation energies) in the benzoin condensation of  $(\text{benzaldehyde})_2 + \text{CN}^- + (\text{H}_2\text{O})_{8+6}$ .

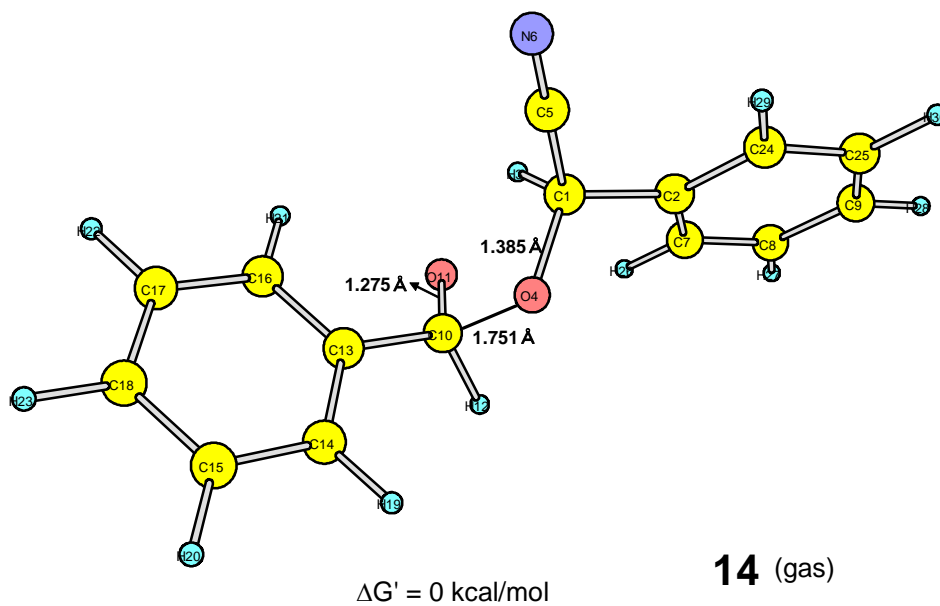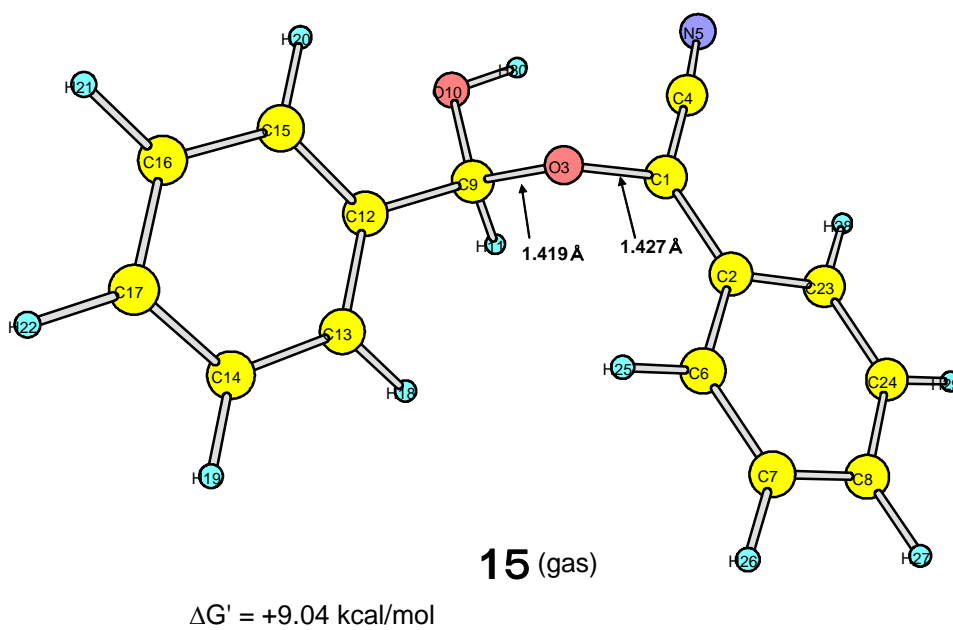

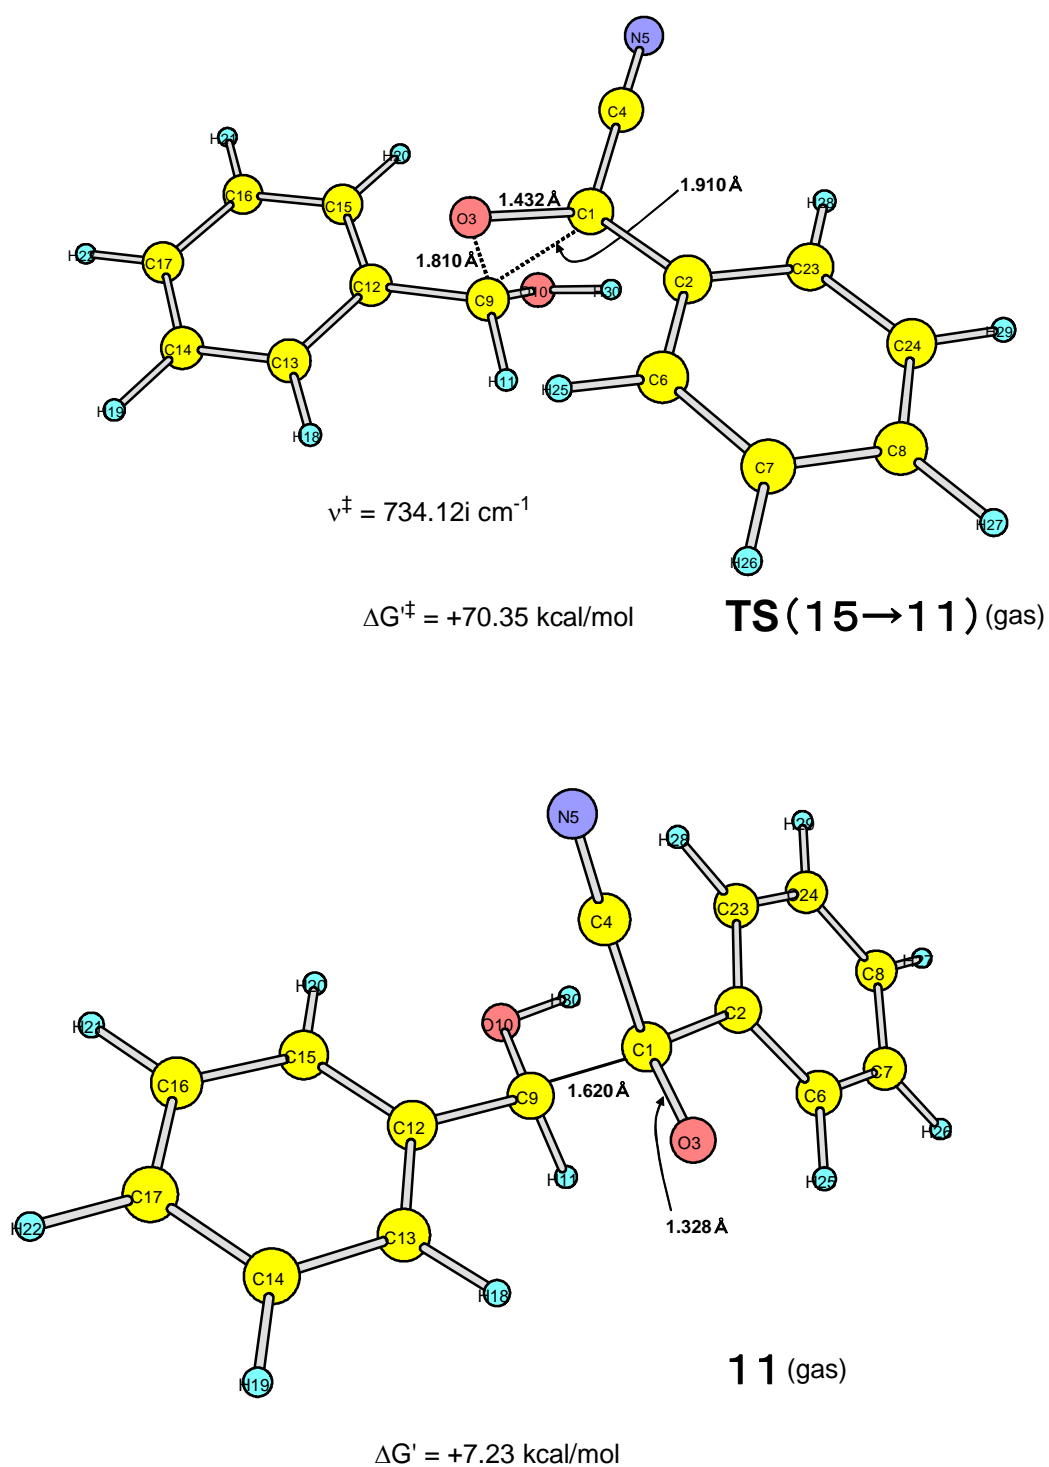

**Figure S4.** Geometries of the species shown in Scheme S1, which were calculated without  $(\text{H}_2\text{O})_8$  and SCRF solvent effect, "gas".  $\Delta G^1$  is the Gibbs free energy relative to that of **14**.

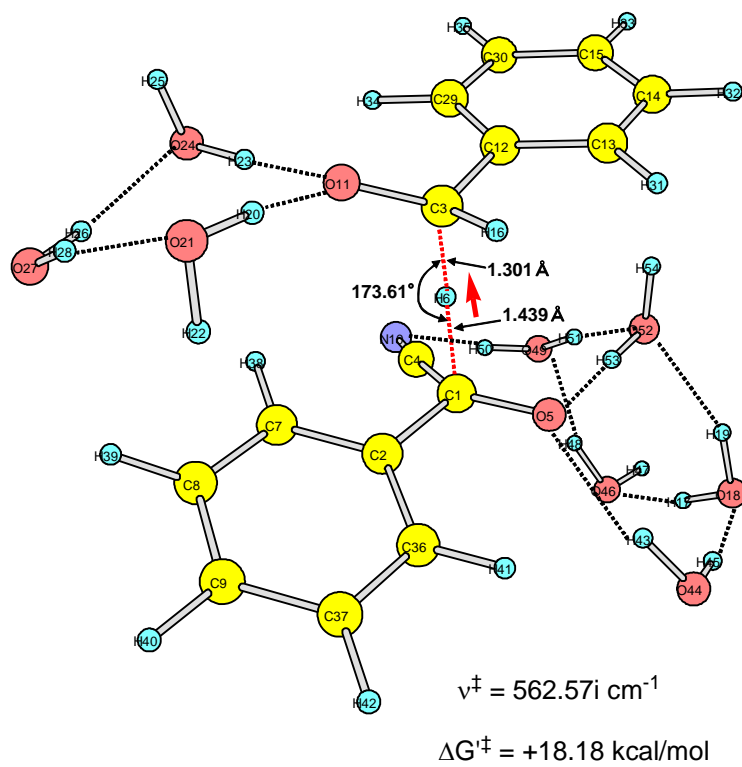

**Figure S5.** A hydride-shift TS in the benzoin-condensation reacting system, **8** + **1** + (H<sub>2</sub>O)<sub>8</sub>.

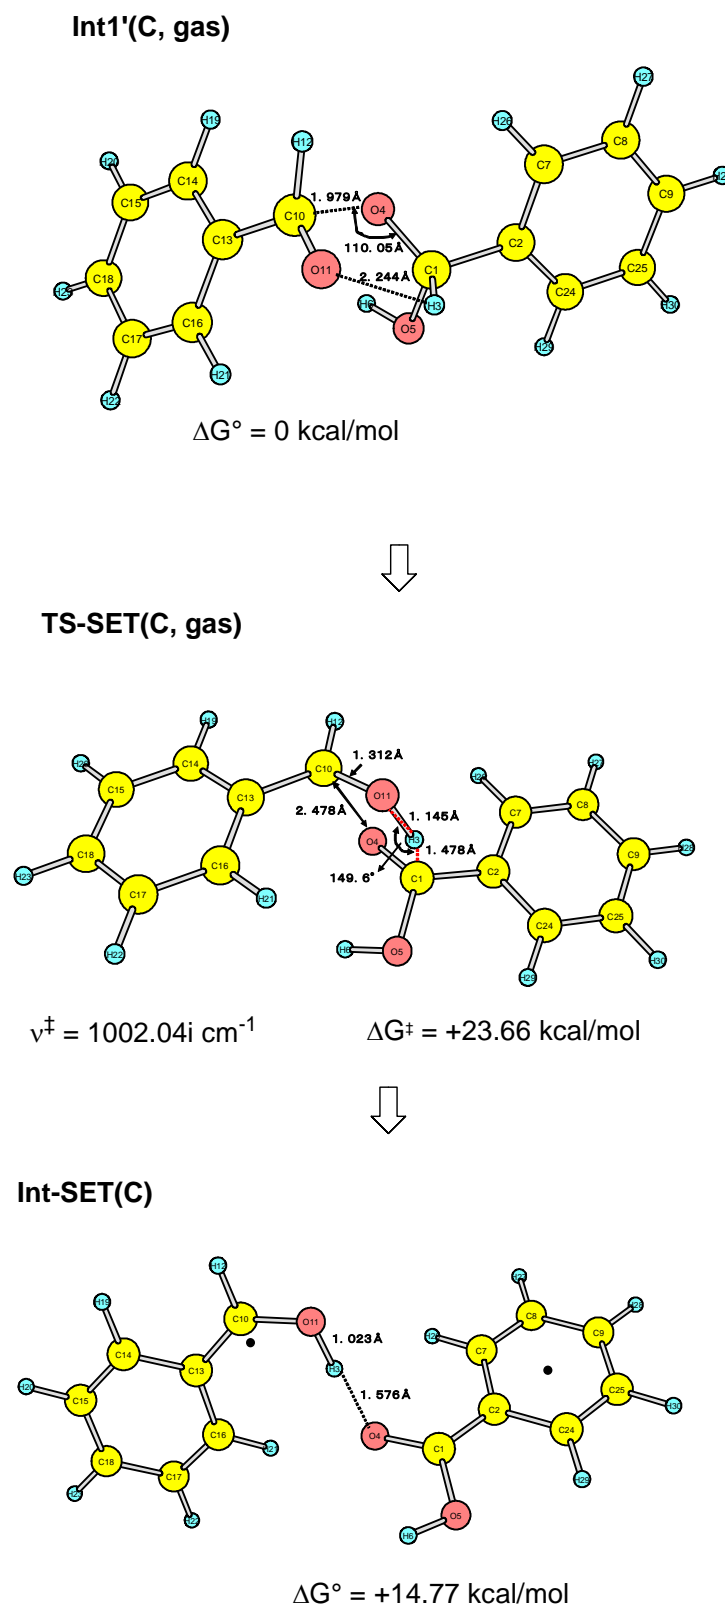

**Figure S6.** Geometries of the species shown in Scheme 7, which were calculated without  $(\text{H}_2\text{O})_8$  and SCRF solvent effect, "gas".

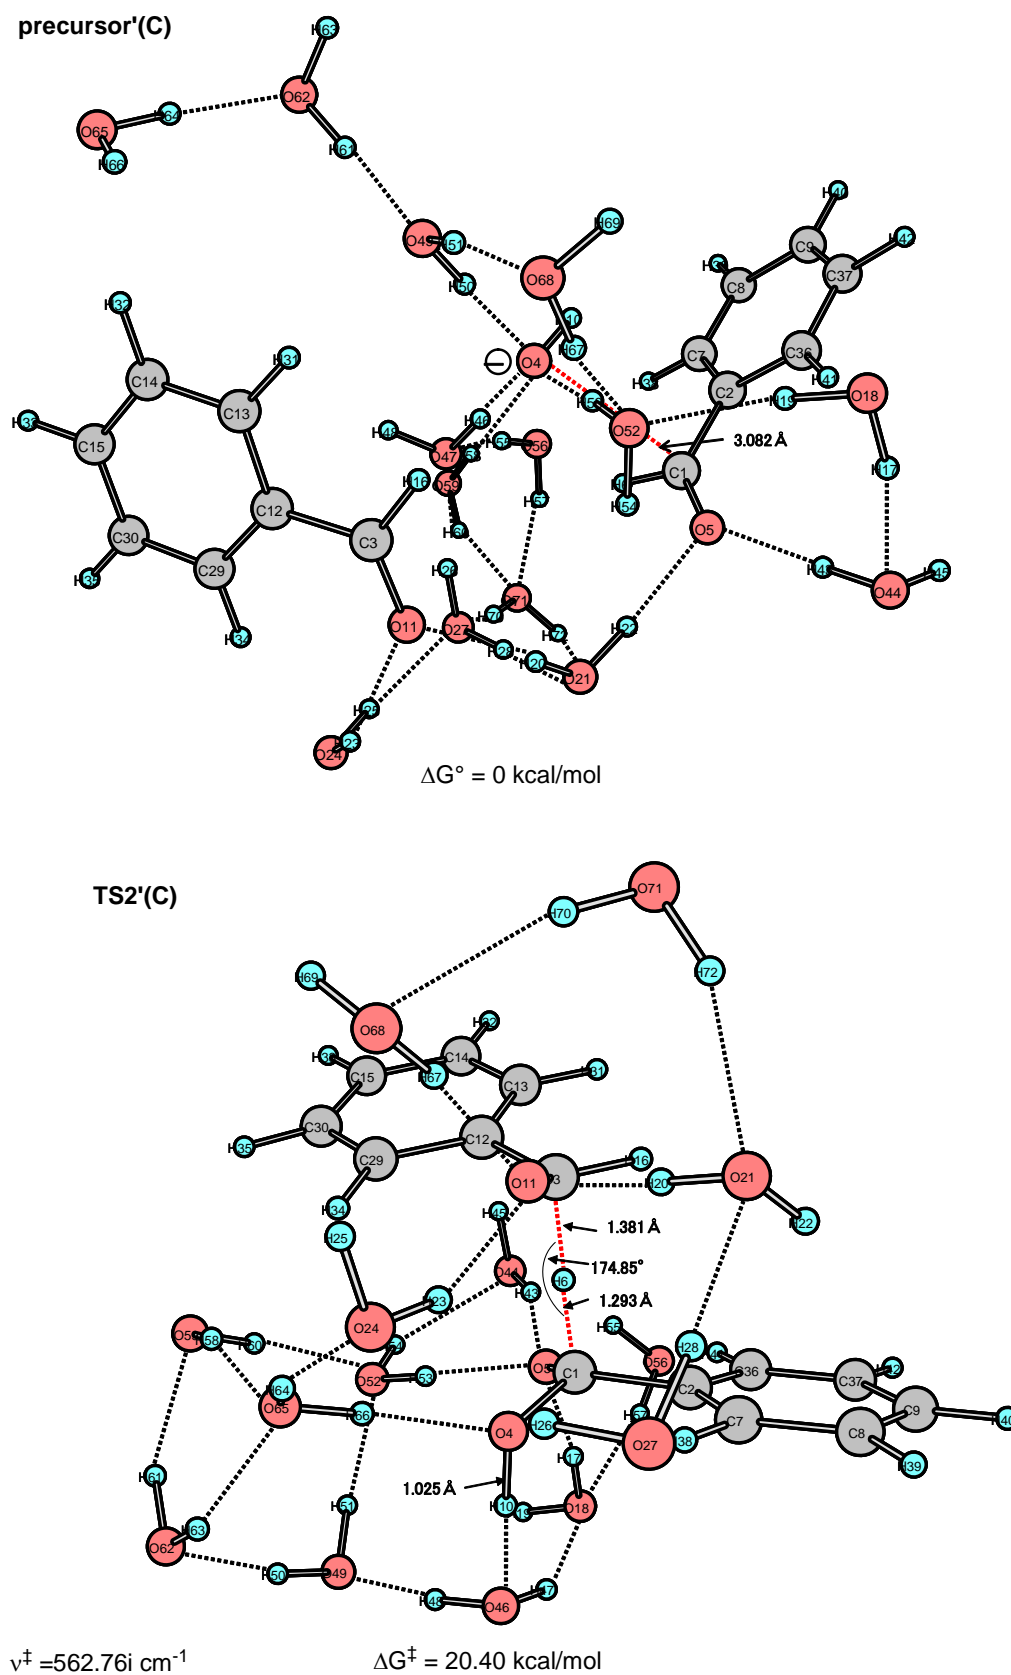

**Figure S7.** Geometries of expanded models, precursor and TS2'(C) in the Cannizzaro reaction.



Fig. 1  
 TS1 (C)

Standard orientation:

| Center Number | Atomic Number | Atomic Type | Coordinates (Angstroms) |           |           |
|---------------|---------------|-------------|-------------------------|-----------|-----------|
|               |               |             | X                       | Y         | Z         |
| 1             | 6             | 0           | 1.824857                | -0.526435 | 0.186375  |
| 2             | 6             | 0           | 3.041780                | -0.878419 | -0.624344 |
| 3             | 6             | 0           | -2.835686               | 0.826414  | 1.029494  |
| 4             | 8             | 0           | 0.950973                | 0.628721  | -1.056053 |
| 5             | 8             | 0           | 1.918263                | 0.115490  | 1.279335  |
| 6             | 1             | 0           | 1.027815                | -1.277344 | 0.107611  |
| 7             | 6             | 0           | 3.050307                | -2.100889 | -1.309540 |
| 8             | 6             | 0           | 4.168226                | -2.494467 | -2.047042 |
| 9             | 6             | 0           | 5.286145                | -1.661128 | -2.112737 |
| 10            | 1             | 0           | 1.431708                | 0.538317  | -1.895245 |
| 11            | 8             | 0           | -2.707127               | 0.125569  | 2.029805  |
| 12            | 6             | 0           | -3.891343               | 0.658641  | 0.010181  |
| 13            | 6             | 0           | -4.010760               | 1.650286  | -0.980647 |
| 14            | 6             | 0           | -5.012914               | 1.548570  | -1.945138 |
| 15            | 6             | 0           | -5.881378               | 0.454479  | -1.930438 |
| 16            | 1             | 0           | -2.131047               | 1.652951  | 0.831017  |
| 17            | 1             | 0           | 4.495127                | 2.371536  | 1.559772  |
| 18            | 8             | 0           | 4.552548                | 2.964529  | 0.780844  |
| 19            | 1             | 0           | 3.610632                | 3.111629  | 0.560741  |
| 20            | 1             | 0           | -0.902017               | -0.390989 | 2.688495  |
| 21            | 8             | 0           | -0.137362               | -0.987205 | 2.786158  |
| 22            | 1             | 0           | 0.612627                | -0.523016 | 2.344136  |
| 23            | 1             | 0           | -3.523532               | -1.921584 | 2.507295  |
| 24            | 8             | 0           | -3.703480               | -2.763016 | 2.058126  |
| 25            | 1             | 0           | -2.842509               | -2.923278 | 1.598103  |
| 26            | 1             | 0           | -1.212314               | -2.235060 | 0.122204  |
| 27            | 8             | 0           | -1.137264               | -2.830811 | 0.900320  |
| 28            | 1             | 0           | -0.729823               | -2.262936 | 1.598011  |
| 29            | 6             | 0           | -4.753171               | -0.454627 | 0.012491  |
| 30            | 6             | 0           | -5.743211               | -0.547117 | -0.961963 |
| 31            | 1             | 0           | -3.300607               | 2.474122  | -0.992165 |
| 32            | 1             | 0           | -5.109205               | 2.313867  | -2.710748 |
| 33            | 1             | 0           | -6.659138               | 0.371732  | -2.686434 |
| 34            | 1             | 0           | -4.603735               | -1.253083 | 0.739687  |
| 35            | 1             | 0           | -6.405312               | -1.408975 | -0.974547 |
| 36            | 6             | 0           | 4.166637                | -0.040850 | -0.694165 |
| 37            | 6             | 0           | 5.278068                | -0.435826 | -1.439315 |
| 38            | 1             | 0           | 2.175061                | -2.745077 | -1.256210 |
| 39            | 1             | 0           | 4.164859                | -3.449119 | -2.567907 |
| 40            | 1             | 0           | 6.158571                | -1.962779 | -2.688301 |
| 41            | 1             | 0           | 4.180286                | 0.924160  | -0.190657 |
| 42            | 1             | 0           | 6.141100                | 0.223343  | -1.494673 |
| 43            | 1             | 0           | 3.306896                | 0.608193  | 2.224029  |
| 44            | 8             | 0           | 4.108628                | 0.897452  | 2.726067  |
| 45            | 1             | 0           | 4.773936                | 0.244983  | 2.459136  |
| 46            | 1             | 0           | -0.452028               | -0.389848 | -1.240669 |
| 47            | 8             | 0           | -1.198352               | -1.040368 | -1.327599 |
| 48            | 1             | 0           | -2.000161               | -0.503111 | -1.410615 |
| 49            | 8             | 0           | -0.898635               | 2.825820  | -0.842732 |
| 50            | 1             | 0           | -0.411081               | 2.009806  | -1.093524 |
| 51            | 1             | 0           | -0.209464               | 3.289468  | -0.327055 |
| 52            | 8             | 0           | 1.646980                | 2.885684  | 0.408484  |
| 53            | 1             | 0           | 1.556048                | 2.097008  | -0.186848 |
| 54            | 1             | 0           | 1.570600                | 2.448373  | 1.274059  |

TS2 (C)

Standard orientation:

| Center Number | Atomic Number | Atomic Type | Coordinates (Angstroms) |           |           |
|---------------|---------------|-------------|-------------------------|-----------|-----------|
|               |               |             | X                       | Y         | Z         |
| 1             | 6             | 0           | -0.757137               | -0.321670 | -0.172706 |
| 2             | 6             | 0           | 0.108347                | -1.563559 | -0.133894 |
| 3             | 6             | 0           | 1.096576                | 1.347919  | -1.152305 |
| 4             | 8             | 0           | -0.958262               | 0.277178  | 1.067025  |
| 5             | 8             | 0           | -1.736852               | -0.257503 | -1.012418 |
| 6             | 1             | 0           | 0.190129                | 0.522423  | -0.640840 |
| 7             | 6             | 0           | 1.239017                | -1.614958 | 0.694245  |
| 8             | 6             | 0           | 2.086516                | -2.724922 | 0.669264  |
| 9             | 6             | 0           | 1.790565                | -3.807075 | -0.165322 |
| 10            | 1             | 0           | -1.124701               | -0.402037 | 1.792961  |
| 11            | 8             | 0           | 2.276523                | 0.997941  | -0.757172 |
| 12            | 6             | 0           | 0.497009                | 2.660261  | -0.719435 |
| 13            | 6             | 0           | -0.636343               | 3.152779  | -1.381935 |
| 14            | 6             | 0           | -1.210085               | 4.365138  | -1.001369 |
| 15            | 6             | 0           | -0.654021               | 5.100896  | 0.047515  |
| 16            | 1             | 0           | 0.822543                | 1.089254  | -2.196834 |
| 17            | 1             | 0           | -2.217090               | -3.192008 | 0.568612  |
| 18            | 8             | 0           | -3.007274               | -3.065742 | 1.119126  |

|    |   |   |           |           |           |
|----|---|---|-----------|-----------|-----------|
| 19 | 1 | 0 | -3.527572 | -2.382312 | 0.630990  |
| 20 | 1 | 0 | 3.316353  | -0.260634 | -1.431182 |
| 21 | 8 | 0 | 3.894907  | -1.032706 | -1.653777 |
| 22 | 1 | 0 | 3.331850  | -1.786064 | -1.413394 |
| 23 | 1 | 0 | 3.124073  | 1.217666  | 0.738720  |
| 24 | 8 | 0 | 3.767210  | 1.335432  | 1.485122  |
| 25 | 1 | 0 | 4.535376  | 1.725171  | 1.039251  |
| 26 | 1 | 0 | 4.581884  | -0.460598 | 1.389926  |
| 27 | 8 | 0 | 5.040733  | -1.248341 | 1.034933  |
| 28 | 1 | 0 | 4.824959  | -1.196767 | 0.080392  |
| 29 | 6 | 0 | 1.046397  | 3.399060  | 0.337035  |
| 30 | 6 | 0 | 0.473034  | 4.613042  | 0.713930  |
| 31 | 1 | 0 | -1.070969 | 2.572332  | -2.192311 |
| 32 | 1 | 0 | -2.090466 | 4.735183  | -1.521709 |
| 33 | 1 | 0 | -1.098880 | 6.047291  | 0.346575  |
| 34 | 1 | 0 | 1.917446  | 3.015947  | 0.859029  |
| 35 | 1 | 0 | 0.905580  | 5.179669  | 1.535318  |
| 36 | 6 | 0 | -0.168371 | -2.644241 | -0.985963 |
| 37 | 6 | 0 | 0.658232  | -3.768818 | -0.985167 |
| 38 | 1 | 0 | 1.472659  | -0.771597 | 1.334467  |
| 39 | 1 | 0 | 3.003114  | -2.704535 | 1.252412  |
| 40 | 1 | 0 | 2.447243  | -4.673745 | -0.183811 |
| 41 | 1 | 0 | -1.025516 | -2.589192 | -1.650195 |
| 42 | 1 | 0 | 0.426937  | -4.607927 | -1.637206 |
| 43 | 1 | 0 | -2.535437 | -1.048696 | -2.361882 |
| 44 | 8 | 0 | -3.237890 | -1.448527 | -2.934377 |
| 45 | 1 | 0 | -3.152285 | -1.008383 | -3.792314 |
| 46 | 8 | 0 | -2.009951 | -1.232713 | 2.976178  |
| 47 | 1 | 0 | -2.362482 | -1.996040 | 2.457209  |
| 48 | 1 | 0 | -2.729534 | -0.562156 | 2.910154  |
| 49 | 8 | 0 | -3.679632 | 0.858792  | 2.061571  |
| 50 | 1 | 0 | -2.843766 | 1.113852  | 1.624725  |
| 51 | 1 | 0 | -4.142784 | 0.365351  | 1.355073  |
| 52 | 8 | 0 | -4.170306 | -0.873685 | -0.144530 |
| 53 | 1 | 0 | -3.264422 | -0.531399 | -0.395982 |
| 54 | 1 | 0 | -4.566315 | -1.054161 | -1.014954 |

TS3 (C)

Standard orientation:

| Center<br>Number | Atomic<br>Number | Atomic<br>Type | Coordinates (Angstroms) |           |           |
|------------------|------------------|----------------|-------------------------|-----------|-----------|
|                  |                  |                | X                       | Y         | Z         |
| 1                | 6                | 0              | 3.480561                | -1.175912 | 0.211105  |
| 2                | 6                | 0              | 4.600994                | -0.203228 | -0.075794 |
| 3                | 6                | 0              | -2.751746               | -0.858388 | -1.006905 |
| 4                | 8                | 0              | 2.465452                | -0.675553 | 0.837892  |
| 5                | 8                | 0              | 3.588628                | -2.359603 | -0.167028 |
| 6                | 1                | 0              | -2.313049               | -1.612205 | -0.334326 |
| 7                | 6                | 0              | 4.446519                | 1.165735  | 0.182451  |
| 8                | 6                | 0              | 5.491433                | 2.048701  | -0.093921 |
| 9                | 6                | 0              | 6.696617                | 1.572814  | -0.616665 |
| 10               | 1                | 0              | 1.629144                | -1.620322 | 1.414639  |
| 11               | 8                | 0              | -1.963472               | 0.323587  | -0.966910 |
| 12               | 6                | 0              | -4.207429               | -0.632004 | -0.635629 |
| 13               | 6                | 0              | -5.237470               | -1.083474 | -1.468016 |
| 14               | 6                | 0              | -6.577480               | -0.891070 | -1.121935 |
| 15               | 6                | 0              | -6.905058               | -0.232788 | 0.063466  |
| 16               | 1                | 0              | -2.693131               | -1.263434 | -2.023455 |
| 17               | 1                | 0              | -2.668159               | 1.940004  | -1.374231 |
| 18               | 8                | 0              | -3.137409               | 2.806370  | -1.326132 |
| 19               | 1                | 0              | -3.966628               | 2.563291  | -0.885265 |
| 20               | 1                | 0              | -0.196789               | -0.095031 | -1.280462 |
| 21               | 8                | 0              | 0.733196                | -0.377529 | -1.424486 |
| 22               | 1                | 0              | 1.188238                | -0.297821 | -0.558778 |
| 23               | 1                | 0              | -1.677265               | 0.531550  | 0.026704  |
| 24               | 8                | 0              | -1.147181               | 0.808007  | 1.351641  |
| 25               | 1                | 0              | -1.503489               | 1.667686  | 1.652093  |
| 26               | 1                | 0              | 0.398313                | 1.679247  | 0.816193  |
| 27               | 8                | 0              | 0.913569                | 2.370014  | 0.331830  |
| 28               | 1                | 0              | 1.039040                | 1.966652  | -0.543082 |
| 29               | 6                | 0              | -4.547403               | 0.027468  | 0.556767  |
| 30               | 6                | 0              | -5.884618               | 0.227424  | 0.900858  |
| 31               | 1                | 0              | -4.987139               | -1.585855 | -2.400267 |
| 32               | 1                | 0              | -7.363334               | -1.247466 | -1.783921 |
| 33               | 1                | 0              | -7.946684               | -0.076194 | 0.333250  |
| 34               | 1                | 0              | -3.754882               | 0.385252  | 1.209931  |
| 35               | 1                | 0              | -6.130249               | 0.741649  | 1.826917  |
| 36               | 6                | 0              | 5.805836                | -0.674123 | -0.611268 |
| 37               | 6                | 0              | 6.852571                | 0.208022  | -0.875319 |
| 38               | 1                | 0              | 3.500468                | 1.524815  | 0.576910  |
| 39               | 1                | 0              | 5.363717                | 3.111267  | 0.099636  |
| 40               | 1                | 0              | 7.510870                | 2.263645  | -0.826157 |
| 41               | 1                | 0              | 5.896012                | -1.737056 | -0.811864 |
| 42               | 1                | 0              | 7.788479                | -0.165394 | -1.285822 |
| 43               | 1                | 0              | 1.934888                | -3.085233 | -0.657703 |

|    |   |   |           |           |           |
|----|---|---|-----------|-----------|-----------|
| 44 | 8 | 0 | 0.956123  | -3.135009 | -0.792818 |
| 45 | 1 | 0 | 0.772252  | -2.259867 | -1.210550 |
| 46 | 8 | 0 | 0.891571  | -2.362630 | 1.726439  |
| 47 | 1 | 0 | 0.676280  | -2.791016 | 0.838548  |
| 48 | 1 | 0 | 0.035053  | -1.851321 | 2.174876  |
| 49 | 1 | 0 | -1.100856 | -0.135354 | 2.158053  |
| 50 | 8 | 0 | -0.976883 | -1.127066 | 2.785440  |
| 51 | 1 | 0 | -1.817209 | -1.606565 | 2.726775  |
| 52 | 1 | 0 | -2.150830 | 3.463474  | 0.185388  |
| 53 | 8 | 0 | -1.616154 | 3.623798  | 0.993431  |
| 54 | 1 | 0 | -0.702531 | 3.441446  | 0.686411  |

Fig. 3  
TS-SET (C)

Standard orientation:

| Center Number | Atomic Number | Atomic Type | Coordinates (Angstroms) |           |           |
|---------------|---------------|-------------|-------------------------|-----------|-----------|
|               |               |             | X                       | Y         | Z         |
| 1             | 6             | 0           | -0.814305               | 0.417250  | -0.074239 |
| 2             | 6             | 0           | -2.278238               | 0.266053  | -0.200813 |
| 3             | 1             | 0           | -0.411174               | -1.029553 | -0.340658 |
| 4             | 8             | 0           | -0.091241               | 0.926891  | -1.009621 |
| 5             | 8             | 0           | -0.401358               | 0.598866  | 1.269802  |
| 6             | 1             | 0           | 0.576806                | 0.812510  | 1.277467  |
| 7             | 6             | 0           | -2.865113               | 0.231050  | -1.484352 |
| 8             | 6             | 0           | -4.236465               | 0.047787  | -1.634517 |
| 9             | 6             | 0           | -5.061930               | -0.105352 | -0.515574 |
| 10            | 6             | 0           | 1.278651                | -1.488215 | -1.338736 |
| 11            | 8             | 0           | 0.249679                | -1.877283 | -0.590804 |
| 12            | 1             | 0           | 1.082321                | -1.311699 | -2.394979 |
| 13            | 6             | 0           | 2.600254                | -1.333463 | -0.826390 |
| 14            | 6             | 0           | 3.646112                | -0.936256 | -1.703052 |
| 15            | 6             | 0           | 4.953075                | -0.803946 | -1.256789 |
| 16            | 6             | 0           | 2.952632                | -1.592914 | 0.528887  |
| 17            | 6             | 0           | 4.268963                | -1.457805 | 0.962232  |
| 18            | 6             | 0           | 5.282968                | -1.062550 | 0.080336  |
| 19            | 1             | 0           | 3.403705                | -0.722632 | -2.741458 |
| 20            | 1             | 0           | 5.725836                | -0.487756 | -1.954012 |
| 21            | 1             | 0           | 2.188512                | -1.918149 | 1.227771  |
| 22            | 1             | 0           | 4.509521                | -1.674330 | 2.001413  |
| 23            | 1             | 0           | 6.306875                | -0.956316 | 0.428127  |
| 24            | 6             | 0           | -3.119989               | 0.114161  | 0.922945  |
| 25            | 6             | 0           | -4.493395               | -0.067528 | 0.761542  |
| 26            | 1             | 0           | -2.224425               | 0.340574  | -2.353581 |
| 27            | 1             | 0           | -4.665151               | 0.019080  | -2.633469 |
| 28            | 1             | 0           | -6.131794               | -0.252837 | -0.636793 |
| 29            | 1             | 0           | -2.689455               | 0.157566  | 1.917469  |
| 30            | 1             | 0           | -5.125030               | -0.172141 | 1.640989  |
| 31            | 1             | 0           | -1.025242               | -3.314048 | -1.143499 |
| 32            | 8             | 0           | -1.718013               | -3.994721 | -1.118899 |
| 33            | 1             | 0           | -2.095385               | -3.886434 | -0.221291 |
| 34            | 1             | 0           | 0.096723                | -2.349028 | 1.328224  |
| 35            | 8             | 0           | -0.247395               | -2.136952 | 2.218041  |
| 36            | 1             | 0           | -0.356496               | -1.165307 | 2.155626  |
| 37            | 1             | 0           | -1.902812               | -2.915674 | 1.892096  |
| 38            | 8             | 0           | -2.737614               | -3.260756 | 1.499408  |
| 39            | 1             | 0           | -3.173193               | -2.460148 | 1.164464  |
| 40            | 8             | 0           | 2.160204                | 1.382815  | 1.620812  |
| 41            | 1             | 0           | 2.310524                | 1.892946  | 0.767763  |
| 42            | 1             | 0           | 2.720332                | 0.590223  | 1.536124  |
| 43            | 1             | 0           | -0.854860               | 2.427982  | -1.660781 |
| 44            | 8             | 0           | -1.353099               | 3.275308  | -1.759531 |
| 45            | 1             | 0           | -2.233779               | 3.042513  | -1.426761 |
| 46            | 1             | 0           | 1.480637                | 1.994426  | -1.006308 |
| 47            | 8             | 0           | 2.160318                | 2.640109  | -0.713171 |
| 48            | 1             | 0           | 1.634169                | 3.461840  | -0.513502 |
| 49            | 1             | 0           | 0.943350                | 2.787387  | 2.528028  |
| 50            | 8             | 0           | 0.056215                | 3.192708  | 2.486506  |
| 51            | 1             | 0           | -0.482240               | 2.437135  | 2.182693  |
| 52            | 1             | 0           | 0.203932                | 4.216788  | 0.896884  |
| 53            | 8             | 0           | 0.400551                | 4.602451  | 0.013182  |
| 54            | 1             | 0           | -0.317498               | 4.269962  | -0.572727 |

Fig. 4  
TS1 (B)

Standard orientation:

| Center Number | Atomic Number | Atomic Type | Coordinates (Angstroms) |           |           |
|---------------|---------------|-------------|-------------------------|-----------|-----------|
|               |               |             | X                       | Y         | Z         |
| 1             | 6             | 0           | -3.423115               | 0.467729  | -1.172553 |
| 2             | 6             | 0           | -2.522746               | 1.639088  | -1.339118 |
| 3             | 6             | 0           | 2.517773                | -0.696586 | 0.883603  |
| 4             | 8             | 0           | -3.020487               | -0.716965 | -1.207565 |

|    |   |   |           |           |           |
|----|---|---|-----------|-----------|-----------|
| 5  | 6 | 0 | -3.823608 | 0.799455  | 1.071522  |
| 6  | 7 | 0 | -3.412918 | 0.550973  | 2.145873  |
| 7  | 6 | 0 | -1.162843 | 1.581141  | -1.003327 |
| 8  | 6 | 0 | -0.345042 | 2.695088  | -1.183801 |
| 9  | 6 | 0 | -0.883443 | 3.866890  | -1.728579 |
| 10 | 1 | 0 | -4.191741 | -1.980532 | -0.780751 |
| 11 | 8 | 0 | 3.271497  | -0.135988 | 1.683794  |
| 12 | 6 | 0 | 2.961044  | -1.346358 | -0.356457 |
| 13 | 6 | 0 | 2.015037  | -2.064459 | -1.106582 |
| 14 | 6 | 0 | 2.412408  | -2.701106 | -2.282845 |
| 15 | 6 | 0 | 3.737816  | -2.614218 | -2.711866 |
| 16 | 1 | 0 | 1.435794  | -0.727636 | 1.092288  |
| 17 | 1 | 0 | -4.485359 | 0.678099  | -1.349801 |
| 18 | 8 | 0 | -2.802888 | -3.944140 | 1.138881  |
| 19 | 1 | 0 | -2.066014 | -3.539778 | 0.632508  |
| 20 | 1 | 0 | 2.363827  | 1.206432  | 2.808615  |
| 21 | 8 | 0 | 1.816699  | 1.994690  | 2.976797  |
| 22 | 1 | 0 | 0.907812  | 1.624031  | 2.883737  |
| 23 | 1 | 0 | 4.677547  | 1.056802  | 1.430120  |
| 24 | 8 | 0 | 5.199833  | 1.861314  | 1.229901  |
| 25 | 1 | 0 | 5.187470  | 2.379266  | 2.048770  |
| 26 | 1 | 0 | 3.452434  | 2.677886  | 0.392678  |
| 27 | 8 | 0 | 2.545056  | 3.028327  | 0.411379  |
| 28 | 1 | 0 | 2.216238  | 2.767783  | 1.303166  |
| 29 | 6 | 0 | 4.296338  | -1.261770 | -0.789927 |
| 30 | 6 | 0 | 4.680070  | -1.892746 | -1.966678 |
| 31 | 1 | 0 | 0.984597  | -2.120786 | -0.754699 |
| 32 | 1 | 0 | 1.685531  | -3.260600 | -2.865213 |
| 33 | 1 | 0 | 4.042481  | -3.106529 | -3.632565 |
| 34 | 1 | 0 | 5.012823  | -0.694575 | -0.203902 |
| 35 | 1 | 0 | 5.708606  | -1.823455 | -2.310713 |
| 36 | 6 | 0 | -3.054512 | 2.820177  | -1.870673 |
| 37 | 6 | 0 | -2.234523 | 3.929041  | -2.076771 |
| 38 | 1 | 0 | -0.763919 | 0.674954  | -0.559005 |
| 39 | 1 | 0 | 0.697366  | 2.668234  | -0.871570 |
| 40 | 1 | 0 | -0.245336 | 4.736727  | -1.864959 |
| 41 | 1 | 0 | -4.114885 | 2.866658  | -2.112115 |
| 42 | 1 | 0 | -2.651570 | 4.842973  | -2.493952 |
| 43 | 1 | 0 | -1.372244 | 0.836594  | 2.251560  |
| 44 | 8 | 0 | -0.470017 | 0.503287  | 2.444350  |
| 45 | 1 | 0 | -0.667305 | -0.360111 | 2.854146  |
| 46 | 8 | 0 | -4.705492 | -2.815061 | -0.645830 |
| 47 | 1 | 0 | -3.592120 | -3.607944 | 0.656457  |
| 48 | 1 | 0 | -4.484449 | -3.330549 | -1.436565 |
| 49 | 8 | 0 | -0.957815 | -2.011373 | 0.161965  |
| 50 | 1 | 0 | -1.579550 | -1.478162 | -0.381859 |
| 51 | 1 | 0 | -1.164113 | -1.736563 | 1.087185  |
| 52 | 8 | 0 | -2.005184 | -1.842883 | 2.789062  |
| 53 | 1 | 0 | -2.686268 | -1.139163 | 2.679620  |
| 54 | 1 | 0 | -2.410756 | -2.664725 | 2.418154  |

TS2 (B)

Standard orientation:

| Center Number | Atomic Number | Atomic Type | Coordinates (Angstroms) |           |           |
|---------------|---------------|-------------|-------------------------|-----------|-----------|
|               |               |             | X                       | Y         | Z         |
| 1             | 6             | 0           | -1.370393               | -0.162330 | 1.212339  |
| 2             | 6             | 0           | -2.446397               | -0.082630 | 0.127798  |
| 3             | 6             | 0           | 1.965922                | 1.600670  | -0.090771 |
| 4             | 8             | 0           | -0.080600               | -0.403635 | 0.716342  |
| 5             | 6             | 0           | -1.319566               | 1.131066  | 1.947130  |
| 6             | 7             | 0           | -1.226430               | 2.155638  | 2.489701  |
| 7             | 6             | 0           | -2.427654               | 0.939326  | -0.829658 |
| 8             | 6             | 0           | -3.388136               | 0.978924  | -1.838251 |
| 9             | 6             | 0           | -4.378449               | -0.005794 | -1.902807 |
| 10            | 1             | 0           | -0.045266               | -1.405771 | -0.025266 |
| 11            | 8             | 0           | 1.403766                | 2.498662  | -0.717621 |
| 12            | 6             | 0           | 2.760058                | 0.541698  | -0.741948 |
| 13            | 6             | 0           | 3.324949                | -0.478935 | 0.036608  |
| 14            | 6             | 0           | 4.088786                | -1.473461 | -0.575807 |
| 15            | 6             | 0           | 4.294709                | -1.446662 | -1.957080 |
| 16            | 1             | 0           | 1.934556                | 1.595255  | 1.008753  |
| 17            | 1             | 0           | -1.665416               | -0.931745 | 1.947878  |
| 18            | 8             | 0           | 0.601730                | -4.065810 | 1.321110  |
| 19            | 1             | 0           | 0.620602                | -4.987840 | 1.027188  |
| 20            | 1             | 0           | 0.464353                | 3.706926  | 0.284732  |
| 21            | 8             | 0           | -0.137714               | 4.355981  | 0.715785  |
| 22            | 1             | 0           | -0.739583               | 3.789780  | 1.235959  |
| 23            | 1             | 0           | -0.230039               | 3.256328  | -2.050497 |
| 24            | 8             | 0           | -1.032001               | 3.802666  | -2.020703 |
| 25            | 1             | 0           | -0.946863               | 4.230656  | -1.146155 |
| 26            | 8             | 0           | 0.111615                | -2.449736 | -0.689181 |
| 27            | 1             | 0           | 0.892221                | -2.275680 | -1.237650 |
| 28            | 1             | 0           | -1.187517               | -3.016790 | -1.780320 |
| 29            | 6             | 0           | 2.965598                | 0.562320  | -2.130654 |

|    |   |   |           |           |           |
|----|---|---|-----------|-----------|-----------|
| 30 | 6 | 0 | 3.731386  | -0.428217 | -2.735872 |
| 31 | 1 | 0 | 3.124963  | -0.524200 | 1.104628  |
| 32 | 1 | 0 | 4.513545  | -2.273377 | 0.024299  |
| 33 | 1 | 0 | 4.889051  | -2.223845 | -2.431713 |
| 34 | 1 | 0 | 2.514030  | 1.360463  | -2.711624 |
| 35 | 1 | 0 | 3.888560  | -0.415268 | -3.811285 |
| 36 | 6 | 0 | -3.442278 | -1.062242 | 0.065105  |
| 37 | 6 | 0 | -4.404753 | -1.026572 | -0.949181 |
| 38 | 1 | 0 | -1.670433 | 1.716857  | -0.801103 |
| 39 | 1 | 0 | -3.351953 | 1.786380  | -2.564223 |
| 40 | 1 | 0 | -5.128022 | 0.022524  | -2.690351 |
| 41 | 1 | 0 | -3.454786 | -1.858837 | 0.805127  |
| 42 | 1 | 0 | -5.173573 | -1.794681 | -0.990286 |
| 43 | 1 | 0 | 0.915269  | 2.845494  | 3.148743  |
| 44 | 8 | 0 | 1.646337  | 3.386691  | 2.807984  |
| 45 | 1 | 0 | 1.175879  | 4.013135  | 2.225490  |
| 46 | 8 | 0 | -1.926648 | -3.290381 | -2.381762 |
| 47 | 1 | 0 | 0.422719  | -3.510087 | 0.490255  |
| 48 | 1 | 0 | -2.603845 | -2.612969 | -2.230792 |
| 49 | 8 | 0 | 1.510991  | -1.587205 | 2.648738  |
| 50 | 1 | 0 | 0.976307  | -1.097845 | 1.972096  |
| 51 | 1 | 0 | 1.564617  | -2.485405 | 2.270765  |
| 52 | 8 | 0 | -1.071884 | -2.735861 | 3.305585  |
| 53 | 1 | 0 | -0.805536 | -3.377936 | 2.620390  |
| 54 | 1 | 0 | -0.236242 | -2.234949 | 3.405126  |

TS3 (B)

Standard orientation:

| Center<br>Number | Atomic<br>Number | Atomic<br>Type | Coordinates (Angstroms) |           |           |
|------------------|------------------|----------------|-------------------------|-----------|-----------|
|                  |                  |                | X                       | Y         | Z         |
| 1                | 6                | 0              | 1.496343                | 0.721114  | 0.580952  |
| 2                | 6                | 0              | 2.291615                | -0.365710 | -0.047030 |
| 3                | 6                | 0              | -2.278200               | -1.447290 | 0.637010  |
| 4                | 8                | 0              | 0.100193                | 0.736659  | 0.213272  |
| 5                | 6                | 0              | 1.608010                | 0.795922  | 2.002658  |
| 6                | 7                | 0              | 1.722009                | 0.916446  | 3.163868  |
| 7                | 6                | 0              | 1.733163                | -1.237081 | -1.002739 |
| 8                | 6                | 0              | 2.500843                | -2.238264 | -1.608137 |
| 9                | 6                | 0              | 3.851336                | -2.384342 | -1.291748 |
| 10               | 1                | 0              | -0.005375               | 1.207671  | -0.643645 |
| 11               | 8                | 0              | -1.884539               | -2.500643 | 0.133096  |
| 12               | 6                | 0              | -3.408904               | -0.673600 | 0.092095  |
| 13               | 6                | 0              | -3.736516               | 0.561934  | 0.667118  |
| 14               | 6                | 0              | -4.795063               | 1.310753  | 0.153583  |
| 15               | 6                | 0              | -5.535668               | 0.819114  | -0.922534 |
| 16               | 1                | 0              | -1.788172               | -1.060208 | 1.545781  |
| 17               | 1                | 0              | 2.162454                | 2.089121  | 0.185944  |
| 18               | 8                | 0              | 0.474683                | 4.585920  | -0.560988 |
| 19               | 1                | 0              | 0.747314                | 5.458373  | -0.879531 |
| 20               | 1                | 0              | -0.324701               | -3.066342 | 0.924232  |
| 21               | 8                | 0              | 0.571022                | -3.351101 | 1.214553  |
| 22               | 1                | 0              | 1.160491                | -2.741319 | 0.732967  |
| 23               | 1                | 0              | -0.879774               | -3.878950 | -1.347065 |
| 24               | 8                | 0              | -0.122591               | -4.475190 | -1.461905 |
| 25               | 1                | 0              | 0.306718                | -4.418575 | -0.588168 |
| 26               | 8                | 0              | 2.604935                | 3.085722  | -0.078046 |
| 27               | 1                | 0              | 3.075676                | 3.351399  | 0.729197  |
| 28               | 1                | 0              | 4.052107                | 2.615248  | -1.203402 |
| 29               | 6                | 0              | -4.152747               | -1.159705 | -0.995778 |
| 30               | 6                | 0              | -5.215484               | -0.417753 | -1.497095 |
| 31               | 1                | 0              | -3.147153               | 0.948808  | 1.492769  |
| 32               | 1                | 0              | -5.028800               | 2.279037  | 0.586022  |
| 33               | 1                | 0              | -6.360770               | 1.402936  | -1.323669 |
| 34               | 1                | 0              | -3.875885               | -2.116095 | -1.428652 |
| 35               | 1                | 0              | -5.792404               | -0.791583 | -2.339109 |
| 36               | 6                | 0              | 3.659569                | -0.533669 | 0.267412  |
| 37               | 6                | 0              | 4.423049                | -1.522308 | -0.347826 |
| 38               | 1                | 0              | 0.682123                | -1.140296 | -1.254358 |
| 39               | 1                | 0              | 2.014307                | -2.924249 | -2.296141 |
| 40               | 1                | 0              | 4.448347                | -3.161847 | -1.761266 |
| 41               | 1                | 0              | 4.115429                | 0.113875  | 1.012860  |
| 42               | 1                | 0              | 5.472494                | -1.627474 | -0.079952 |
| 43               | 1                | 0              | 0.247584                | -0.775879 | 3.393898  |
| 44               | 8                | 0              | -0.375559               | -1.518502 | 3.297471  |
| 45               | 1                | 0              | 0.128802                | -2.188073 | 2.794762  |
| 46               | 8                | 0              | -0.947778               | 2.444284  | -1.799497 |
| 47               | 1                | 0              | -0.375411               | 3.235136  | -1.737981 |
| 48               | 1                | 0              | -1.550555               | 2.584972  | -1.037524 |
| 49               | 8                | 0              | -1.573728               | 2.972647  | 0.902380  |
| 50               | 1                | 0              | -0.981756               | 2.194527  | 0.982804  |
| 51               | 1                | 0              | -0.956533               | 3.709706  | 0.734022  |
| 52               | 8                | 0              | 4.869542                | 2.215824  | -1.565970 |
| 53               | 1                | 0              | 1.324640                | 4.078191  | -0.366195 |
| 54               | 1                | 0              | 4.697223                | 1.267124  | -1.458252 |

Fig. 5  
 TS4 (B)

Standard orientation:

| Center<br>Number | Atomic<br>Number | Atomic<br>Type | Coordinates (Angstroms) |           |           |
|------------------|------------------|----------------|-------------------------|-----------|-----------|
|                  |                  |                | X                       | Y         | Z         |
| 1                | 6                | 0              | -0.126249               | 0.482564  | -0.217816 |
| 2                | 6                | 0              | 1.257122                | 0.957773  | -0.021642 |
| 3                | 6                | 0              | -0.118284               | -1.344538 | 0.903189  |
| 4                | 8                | 0              | -0.461317               | 0.025071  | -1.503013 |
| 5                | 6                | 0              | -1.144066               | 1.235195  | 0.418622  |
| 6                | 7                | 0              | -1.996159               | 1.782687  | 1.019273  |
| 7                | 6                | 0              | 2.290696                | 0.382790  | -0.784552 |
| 8                | 6                | 0              | 3.623870                | 0.722472  | -0.554866 |
| 9                | 6                | 0              | 3.957020                | 1.660308  | 0.427576  |
| 10               | 1                | 0              | -0.354310               | 0.780983  | -2.149250 |
| 11               | 8                | 0              | 0.993203                | -1.909120 | 0.632881  |
| 12               | 6                | 0              | -1.411570               | -1.936806 | 0.443932  |
| 13               | 6                | 0              | -2.589945               | -1.702358 | 1.169657  |
| 14               | 6                | 0              | -3.794873               | -2.279851 | 0.765676  |
| 15               | 6                | 0              | -3.838036               | -3.096193 | -0.365940 |
| 16               | 1                | 0              | -0.199124               | -0.815880 | 1.869706  |
| 17               | 1                | 0              | 0.755336                | 3.606517  | -0.824595 |
| 18               | 8                | 0              | 0.161530                | 4.181970  | -1.334348 |
| 19               | 1                | 0              | -0.552011               | 4.419331  | -0.692882 |
| 20               | 1                | 0              | 2.518129                | -1.737761 | 1.536815  |
| 21               | 8                | 0              | 3.418566                | -1.600923 | 1.921231  |
| 22               | 1                | 0              | 3.617690                | -0.688072 | 1.656272  |
| 23               | 1                | 0              | 1.624733                | -2.979404 | -0.594891 |
| 24               | 8                | 0              | 2.131375                | -3.597988 | -1.182058 |
| 25               | 1                | 0              | 2.250526                | -4.396491 | -0.647023 |
| 26               | 1                | 0              | 3.924046                | -2.732996 | -1.003895 |
| 27               | 8                | 0              | 4.743080                | -2.447894 | -0.555310 |
| 28               | 1                | 0              | 4.419357                | -2.258374 | 0.350046  |
| 29               | 6                | 0              | -1.461195               | -2.762655 | -0.690601 |
| 30               | 6                | 0              | -2.666956               | -3.334014 | -1.091844 |
| 31               | 1                | 0              | -2.571421               | -1.069489 | 2.053796  |
| 32               | 1                | 0              | -4.698898               | -2.092837 | 1.340432  |
| 33               | 1                | 0              | -4.777397               | -3.544701 | -0.681410 |
| 34               | 1                | 0              | -0.552638               | -2.943251 | -1.254348 |
| 35               | 1                | 0              | -2.693829               | -3.966427 | -1.976149 |
| 36               | 6                | 0              | 1.606524                | 1.900576  | 0.969002  |
| 37               | 6                | 0              | 2.939314                | 2.250691  | 1.184600  |
| 38               | 1                | 0              | 2.038455                | -0.355206 | -1.536658 |
| 39               | 1                | 0              | 4.400728                | 0.201548  | -1.105995 |
| 40               | 1                | 0              | 4.996357                | 1.925567  | 0.603790  |
| 41               | 1                | 0              | 0.828706                | 2.348585  | 1.583733  |
| 42               | 1                | 0              | 3.182803                | 2.982573  | 1.951644  |
| 43               | 1                | 0              | -2.622344               | 1.171566  | 2.860459  |
| 44               | 8                | 0              | -2.651388               | 0.765566  | 3.749260  |
| 45               | 1                | 0              | -1.743551               | 0.446084  | 3.863165  |
| 46               | 8                | 0              | -0.780972               | 2.167173  | -3.100390 |
| 47               | 1                | 0              | -0.494310               | 2.952828  | -2.581112 |
| 48               | 1                | 0              | -1.727014               | 2.030587  | -2.876203 |
| 49               | 8                | 0              | -3.162209               | 0.957054  | -2.099514 |
| 50               | 1                | 0              | -2.511866               | 0.242078  | -1.947938 |
| 51               | 1                | 0              | -3.323638               | 1.280125  | -1.198076 |
| 52               | 8                | 0              | -1.822811               | 4.623711  | 0.571737  |
| 53               | 1                | 0              | -2.059850               | 3.682069  | 0.735655  |
| 54               | 1                | 0              | -1.394231               | 4.898935  | 1.396234  |

TS5 (B)

Standard orientation:

| Center<br>Number | Atomic<br>Number | Atomic<br>Type | Coordinates (Angstroms) |           |           |
|------------------|------------------|----------------|-------------------------|-----------|-----------|
|                  |                  |                | X                       | Y         | Z         |
| 1                | 6                | 0              | 0.404555                | 0.867169  | 0.607578  |
| 2                | 6                | 0              | -0.517825               | 2.050685  | 0.273035  |
| 3                | 6                | 0              | 0.887553                | 0.186220  | -0.759216 |
| 4                | 8                | 0              | -0.193233               | -0.075363 | 1.476980  |
| 5                | 6                | 0              | 1.579253                | 1.384018  | 1.349829  |
| 6                | 7                | 0              | 2.506156                | 1.807236  | 1.908059  |
| 7                | 6                | 0              | -1.898330               | 1.950869  | 0.458907  |
| 8                | 6                | 0              | -2.731088               | 3.016141  | 0.110308  |
| 9                | 6                | 0              | -2.192624               | 4.187888  | -0.419925 |
| 10               | 1                | 0              | -0.874250               | -0.672383 | 1.029980  |
| 11               | 8                | 0              | -0.200817               | -0.433625 | -1.351961 |
| 12               | 6                | 0              | 2.111338                | -0.714355 | -0.605409 |
| 13               | 6                | 0              | 2.181697                | -1.765728 | 0.321472  |
| 14               | 6                | 0              | 3.320283                | -2.568850 | 0.398379  |
| 15               | 6                | 0              | 4.408041                | -2.342455 | -0.448179 |

|    |   |   |           |           |           |
|----|---|---|-----------|-----------|-----------|
| 16 | 1 | 0 | 1.197635  | 1.033469  | -1.387485 |
| 17 | 8 | 0 | -2.011340 | -1.877981 | 0.879959  |
| 18 | 1 | 0 | -1.519709 | -2.445499 | 0.189304  |
| 19 | 1 | 0 | -2.085039 | -2.369324 | 1.729244  |
| 20 | 1 | 0 | -1.682018 | 0.055564  | -2.403946 |
| 21 | 8 | 0 | -2.555944 | 0.072007  | -2.846652 |
| 22 | 1 | 0 | -3.176304 | -0.130600 | -2.109866 |
| 23 | 1 | 0 | -0.298632 | -1.540607 | -1.254036 |
| 24 | 8 | 0 | -0.712868 | -2.813520 | -1.127137 |
| 25 | 1 | 0 | 0.025275  | -3.438117 | -1.150818 |
| 26 | 1 | 0 | -2.068742 | -2.938584 | -2.325785 |
| 27 | 8 | 0 | -2.859592 | -2.753289 | -2.889842 |
| 28 | 1 | 0 | -2.687699 | -1.828731 | -3.179209 |
| 29 | 6 | 0 | 3.207032  | -0.503252 | -1.455003 |
| 30 | 6 | 0 | 4.347474  | -1.306481 | -1.380360 |
| 31 | 1 | 0 | 1.342417  | -1.947740 | 0.982575  |
| 32 | 1 | 0 | 3.357175  | -3.376675 | 1.125513  |
| 33 | 1 | 0 | 5.292880  | -2.971160 | -0.383525 |
| 34 | 1 | 0 | 3.152504  | 0.288158  | -2.200581 |
| 35 | 1 | 0 | 5.182438  | -1.124738 | -2.052977 |
| 36 | 6 | 0 | 0.021884  | 3.225610  | -0.269538 |
| 37 | 6 | 0 | -0.812805 | 4.288655  | -0.610686 |
| 38 | 1 | 0 | -2.326621 | 1.039505  | 0.860123  |
| 39 | 1 | 0 | -3.804960 | 2.918806  | 0.245005  |
| 40 | 1 | 0 | -2.844021 | 5.014875  | -0.692070 |
| 41 | 1 | 0 | 1.095149  | 3.310087  | -0.429694 |
| 42 | 1 | 0 | -0.382210 | 5.195296  | -1.028604 |
| 43 | 1 | 0 | 3.624113  | 2.863168  | 0.373946  |
| 44 | 8 | 0 | 3.867464  | 2.884653  | -0.567368 |
| 45 | 1 | 0 | 3.971086  | 1.940913  | -0.767260 |
| 46 | 1 | 0 | -0.562986 | -0.146348 | 3.205570  |
| 47 | 8 | 0 | -0.714864 | -0.452250 | 4.131668  |
| 48 | 1 | 0 | 0.152767  | -0.798409 | 4.391283  |
| 49 | 1 | 0 | -3.526310 | -1.419850 | -0.182247 |
| 50 | 8 | 0 | -4.166440 | -1.269390 | -0.907304 |
| 51 | 1 | 0 | -3.900131 | -1.960296 | -1.563110 |
| 52 | 8 | 0 | -2.337663 | -2.629871 | 3.547091  |
| 53 | 1 | 0 | -1.773044 | -1.870318 | 3.837728  |
| 54 | 1 | 0 | -3.240092 | -2.278881 | 3.593907  |

TS6 (B)

Standard orientation:

| Center Number | Atomic Number | Atomic Type | Coordinates (Angstroms) |           |           |
|---------------|---------------|-------------|-------------------------|-----------|-----------|
|               |               |             | X                       | Y         | Z         |
| 1             | 6             | 0           | -0.720123               | 0.817243  | 0.121725  |
| 2             | 6             | 0           | -2.084590               | 0.119904  | 0.377105  |
| 3             | 6             | 0           | 0.108608                | -0.015694 | -0.956874 |
| 4             | 8             | 0           | -0.012925               | 1.066527  | 1.289224  |
| 5             | 6             | 0           | -1.088727               | 2.143002  | -0.471563 |
| 6             | 7             | 0           | -1.396289               | 3.169627  | -0.918370 |
| 7             | 6             | 0           | -2.523976               | -0.073185 | 1.688723  |
| 8             | 6             | 0           | -3.760572               | -0.673597 | 1.939146  |
| 9             | 6             | 0           | -4.573526               | -1.083292 | 0.883711  |
| 10            | 1             | 0           | 0.258578                | 0.146650  | 2.019852  |
| 11            | 8             | 0           | 0.053928                | -1.387696 | -0.648435 |
| 12            | 6             | 0           | 1.549930                | 0.463157  | -1.192764 |
| 13            | 6             | 0           | 1.941031                | 1.809591  | -1.123497 |
| 14            | 6             | 0           | 3.256611                | 2.194181  | -1.396284 |
| 15            | 6             | 0           | 4.212836                | 1.242661  | -1.753911 |
| 16            | 1             | 0           | -0.427770               | 0.084255  | -1.909963 |
| 17            | 8             | 0           | 0.633829                | -0.679414 | 2.841773  |
| 18            | 1             | 0           | 1.129195                | -1.482306 | 2.210916  |
| 19            | 1             | 0           | 1.308800                | -0.223253 | 3.400815  |
| 20            | 1             | 0           | 0.542617                | -2.842004 | -1.736877 |
| 21            | 8             | 0           | 0.706691                | -3.744603 | -2.075626 |
| 22            | 1             | 0           | 0.814340                | -4.259491 | -1.241087 |
| 23            | 1             | 0           | 0.651333                | -1.644704 | 0.130528  |
| 24            | 8             | 0           | 1.576172                | -2.305032 | 1.296732  |
| 25            | 1             | 0           | 2.486344                | -2.052347 | 1.078962  |
| 26            | 1             | 0           | 1.283269                | -3.932375 | 0.887614  |
| 27            | 8             | 0           | 1.191979                | -4.843341 | 0.484807  |
| 28            | 1             | 0           | 2.106708                | -5.160836 | 0.449008  |
| 29            | 6             | 0           | 2.518469                | -0.480305 | -1.573496 |
| 30            | 6             | 0           | 3.832378                | -0.095605 | -1.848216 |
| 31            | 1             | 0           | 1.224621                | 2.578249  | -0.860927 |
| 32            | 1             | 0           | 3.526421                | 3.246017  | -1.333646 |
| 33            | 1             | 0           | 5.236499                | 1.542498  | -1.965232 |
| 34            | 1             | 0           | 2.240185                | -1.523749 | -1.674283 |
| 35            | 1             | 0           | 4.557814                | -0.850893 | -2.141215 |
| 36            | 6             | 0           | -2.910595               | -0.283794 | -0.681374 |
| 37            | 6             | 0           | -4.142271               | -0.886965 | -0.430448 |
| 38            | 1             | 0           | -1.890581               | 0.236158  | 2.510833  |
| 39            | 1             | 0           | -4.081676               | -0.825086 | 2.966936  |

|    |   |   |           |           |           |
|----|---|---|-----------|-----------|-----------|
| 40 | 1 | 0 | -5.532300 | -1.557388 | 1.079775  |
| 41 | 1 | 0 | -2.593922 | -0.150908 | -1.711387 |
| 42 | 1 | 0 | -4.756044 | -1.212803 | -1.265882 |
| 43 | 1 | 0 | -2.155230 | 4.915004  | -1.675096 |
| 44 | 8 | 0 | -2.775193 | 5.592457  | -2.004366 |
| 45 | 1 | 0 | -3.631958 | 5.161269  | -1.872440 |
| 46 | 1 | 0 | 1.219666  | 2.186710  | 1.708292  |
| 47 | 8 | 0 | 2.037896  | 2.639077  | 2.047915  |
| 48 | 1 | 0 | 2.703023  | 2.377685  | 1.391061  |
| 49 | 1 | 0 | -2.045877 | -2.643454 | -1.580193 |
| 50 | 8 | 0 | -2.047457 | -3.035069 | -2.467746 |
| 51 | 1 | 0 | -1.176515 | -3.487033 | -2.484135 |
| 52 | 8 | 0 | 2.283058  | 1.057827  | 4.263006  |
| 53 | 1 | 0 | 2.297107  | 1.686580  | 3.491947  |
| 54 | 1 | 0 | 1.602654  | 1.430496  | 4.844262  |

TS7 (B)

Standard orientation:

| Center<br>Number | Atomic<br>Number | Atomic<br>Type | Coordinates (Angstroms) |           |           |
|------------------|------------------|----------------|-------------------------|-----------|-----------|
|                  |                  |                | X                       | Y         | Z         |
| 1                | 6                | 0              | -0.931750               | -0.524892 | -0.112955 |
| 2                | 6                | 0              | -2.392834               | -0.933040 | -0.186671 |
| 3                | 6                | 0              | 0.097395                | -1.479031 | -0.778686 |
| 4                | 8                | 0              | -0.549042               | 0.136890  | 0.882081  |
| 5                | 6                | 0              | -1.152002               | 0.974204  | -1.746199 |
| 6                | 7                | 0              | -1.257823               | 2.079045  | -2.134354 |
| 7                | 6                | 0              | -3.269850               | -0.396801 | 0.763620  |
| 8                | 6                | 0              | -4.621101               | -0.740933 | 0.764137  |
| 9                | 6                | 0              | -5.116324               | -1.636358 | -0.184364 |
| 10               | 1                | 0              | -1.286200               | 4.656574  | 0.047425  |
| 11               | 8                | 0              | -0.001217               | -2.703454 | -0.041642 |
| 12               | 6                | 0              | 1.543898                | -0.979115 | -0.849923 |
| 13               | 6                | 0              | 1.871099                | 0.339850  | -1.193746 |
| 14               | 6                | 0              | 3.201343                | 0.748348  | -1.322095 |
| 15               | 6                | 0              | 4.239972                | -0.158247 | -1.097003 |
| 16               | 1                | 0              | -0.234542               | -1.714100 | -1.793112 |
| 17               | 8                | 0              | -0.618084               | 4.357634  | -0.606744 |
| 18               | 1                | 0              | 0.032204                | 3.193731  | 0.697338  |
| 19               | 1                | 0              | -1.048066               | 3.672493  | -1.177102 |
| 20               | 1                | 0              | 3.203716                | -1.159135 | 1.735566  |
| 21               | 8                | 0              | 2.909294                | -0.893999 | 2.623055  |
| 22               | 1                | 0              | 2.766568                | 0.081950  | 2.525277  |
| 23               | 1                | 0              | 0.205177                | -2.513509 | 0.920020  |
| 24               | 8                | 0              | 0.009190                | 2.707410  | 1.556857  |
| 25               | 1                | 0              | -0.300448               | 1.798864  | 1.321534  |
| 26               | 1                | 0              | 1.715384                | 2.145415  | 1.956255  |
| 27               | 8                | 0              | 2.633052                | 1.786415  | 1.955956  |
| 28               | 1                | 0              | 2.794345                | 1.617894  | 1.011860  |
| 29               | 6                | 0              | 2.595406                | -1.887884 | -0.646303 |
| 30               | 6                | 0              | 3.928811                | -1.478337 | -0.763620 |
| 31               | 1                | 0              | 1.090709                | 1.063105  | -1.381919 |
| 32               | 1                | 0              | 3.394477                | 1.776693  | -1.617159 |
| 33               | 1                | 0              | 5.277020                | 0.154878  | -1.193036 |
| 34               | 1                | 0              | 2.378326                | -2.925924 | -0.415157 |
| 35               | 1                | 0              | 4.723842                | -2.203896 | -0.605368 |
| 36               | 6                | 0              | -2.898471               | -1.833722 | -1.134271 |
| 37               | 6                | 0              | -4.247415               | -2.182537 | -1.132132 |
| 38               | 1                | 0              | -2.874493               | 0.295617  | 1.499131  |
| 39               | 1                | 0              | -5.286671               | -0.308773 | 1.507721  |
| 40               | 1                | 0              | -6.169283               | -1.908578 | -0.185903 |
| 41               | 1                | 0              | -2.242016               | -2.268132 | -1.880080 |
| 42               | 1                | 0              | -4.620683               | -2.885126 | -1.873397 |
| 43               | 1                | 0              | 0.700369                | 2.979893  | -2.672179 |
| 44               | 8                | 0              | 1.474509                | 3.531085  | -2.455034 |
| 45               | 1                | 0              | 1.098636                | 4.136719  | -1.793339 |
| 46               | 1                | 0              | -0.115019               | -1.195443 | 2.374221  |
| 47               | 8                | 0              | 0.401346                | -2.004168 | 2.549152  |
| 48               | 1                | 0              | 1.324536                | -1.648936 | 2.652714  |
| 49               | 1                | 0              | 0.775864                | -4.382797 | -0.271121 |
| 50               | 8                | 0              | 1.310617                | -5.185789 | -0.099042 |
| 51               | 1                | 0              | 1.394395                | -5.173985 | 0.866440  |
| 52               | 8                | 0              | -1.864428               | 4.747665  | 1.900095  |
| 53               | 1                | 0              | -1.355693               | 3.913058  | 2.024835  |
| 54               | 1                | 0              | -1.268667               | 5.421571  | 2.262411  |
